# Supplementary material
Source: Frontiers journal article supplement (https://www.frontiersin.org/articles/213244)
Supplement: Data_Sheet_1.XLS [file Data_Sheet_1.XLS]

## Sheet: TableS1_Counts
Supplementary Table S1. Gene counts for each sample library
Sample number	Lens Condition	Time	Read Depth
73	No Lens	1 Day	4159010
74	No Lens	1 Day	5082723
77	No Lens	1 Day	10150643
82	No Lens	2 Days	9903280
84	No Lens	2 Days	3078630
85	No Lens	2 Days	3948269
100	No Lens	3 Days	5398711
102	No Lens	3 Days	5258780
103	No Lens	3 Days	5049667
104	No Lens	3 Days	10837777
39	Negative Lens	1 Day	4682806
44	Negative Lens	1 Day	3448029
45	Negative Lens	1 Day	4250322
46	Negative Lens	1 Day	11363256
48	Negative Lens	2 Days	4044390
49	Negative Lens	2 Days	11218921
57	Negative Lens	2 Days	4625981
58	Negative Lens	2 Days	4980452
59	Negative Lens	3 Days	4228007
60	Negative Lens	3 Days	8128873
68	Negative Lens	3 Days	2696978
69	Negative Lens	3 Days	9231808
1	Positive Lens	1 Day	4373858
2	Positive Lens	1 Day	4432481
8	Positive Lens	1 Day	3478586
11	Positive Lens	1 Day	13768357
13	Positive Lens	2 Days	3750811
15	Positive Lens	2 Days	3384587
16	Positive Lens	2 Days	6493859
18	Positive Lens	2 Days	6093907
26	Positive Lens	3 Days	5984216
32	Positive Lens	3 Days	1592971
33	Positive Lens	3 Days	5124729
36	Positive Lens	3 Days	7980115

## Sheet: TableS2_EdgeRDEGLens
Supplementary Table S2. Genes differentially-expressed during myopia and hyperopia induction relative to no lens controls (EdgeR analysis)
To identify differentially-expressed genes in lens-groups relative to controls, counts files for all lens conditions were loaded into degust (Victorian Bioinformatics Consortium; www.github.com/Victorian-Bioinformatics-Consortium/degust) separately for each time-point. Differentially-expressed genes for each lens condition (myopia or hyperopia induction) relative to age-matched No Lens controls w…
Lens condition	Time-point	Gene Symbol	Gene Name	Ensemble ID	Log2 Fold change	FDR adjusted p-value
Negative	1 day	BMP2	Bone morphogenetic protein 2 (BMP2)	ENSGALG00000008830	-1.67	0
		ENSGALG00000025733	Uncharacterized protein	ENSGALG00000025733	-0.93	0.001
		CCDC80	Coiled-coil domain-containing protein 80 precursor	ENSGALG00000015193	-0.78	0.001
		LOC396454	Gallus gallus purpurin (LOC396454), mRNA.	ENSGALG00000015374	-1.33	0.005
		PDK4	Pyruvate dehydrogenase kinase, isozyme 4 (PDK4), nuclear gene encoding mitochondrial protein	ENSGALG00000009700	1.11	0.005
		ENSGALG00000006384	Uncharacterized protein	ENSGALG00000006384	1.76	0.008
		RGS16	Regulator of G-protein signaling 16 (RGS16)	ENSGALG00000027550	-0.85	0.008
		ZNFX1	Zinc finger, NFX1-type containing 1	ENSGALG00000004859	0.95	0.02
		GUCA1A	Guanylate cyclase activator 1A (retina) (GUCA1A)	ENSGALG00000001431	-0.73	0.023
		IL1RL1	Interleukin 1 receptor-like 1 (IL1RL1), transcript variant 3	ENSGALG00000016785	0.83	0.027
		PTPRO	Protein tyrosine phosphatase, receptor type, O (PTPRO)	ENSGALG00000013085	0.61	0.031
		CCDC18	Coiled-coil domain containing 18 (CCDC18)	ENSGALG00000005889	-1.06	0.031
		ENSGALG00000013057	Ubiquitin carboxyl-terminal hydrolase	ENSGALG00000013057	1.19	0.035
		SLC38A4	Solute carrier family 38, member 4 (SLC38A4)	ENSGALG00000009730	1.56	0.035
		BMP7	Bone morphogenetic protein 7	ENSGALG00000007668	-0.62	0.049
		NFIL3	Nuclear factor, interleukin 3 regulated (NFIL3)	ENSGALG00000015209	0.57	0.049
Negative	2 days	OTUD1	OTU domain containing 1	ENSGALG00000026426	0.84	0
		NFIL3	Nuclear factor, interleukin 3 regulated (NFIL3)	ENSGALG00000015209	0.73	0.003
		MT-ND6	NADH-ubiquinone oxidoreductase chain 6	ENSGALG00000018357	-1.31	0.004
		CCBE1	Collagen and calcium binding EGF domains 1	ENSGALG00000027785	-0.9	0.004
		BLIMP-1	Uncharacterized protein	ENSGALG00000015388	0.87	0.006
		PTX3	Pentraxin-related protein PTX3 precursor	ENSGALG00000028284	-2.5	0.02
		WNT9A	Wingless-type MMTV integration site family, member 9A (WNT9A)	ENSGALG00000005401	1.81	0.02
		TNC	Tenascin C (TNC)	ENSGALG00000007113	-0.98	0.022
		ARNTL	Aryl hydrocarbon receptor nuclear translocator-like (ARNTL)	ENSGALG00000005378	0.53	0.023
		KCNH7	Potassium voltage-gated channel, subfamily H (eag-related), member 7	ENSGALG00000011082	-0.86	0.023
		CNGA3	Cyclic nucleotide gated channel alpha 3 (CNGA3)	ENSGALG00000016749	-0.82	0.023
		CPM	Carboxypeptidase M precursor	ENSGALG00000009945	-1.45	0.023
Negative	3 days	WNT9A	Gallus gallus wingless-type MMTV integration site family, member 9A (WNT9A), mRNA	ENSGALG00000005401	2.69	0
		NPR3	natriuretic peptide receptor C/guanylate cyclase C (atrionatriuretic peptide receptor C)	ENSGALG00000017405	-1.33	0
		SLC6A2	Gallus gallus solute carrier family 6 (neurotransmitter transporter, noradrenalin), member 2 (SLC6A2), mRNA	ENSGALG00000003560	-1.33	0.002
		GNAT1	Gallus gallus guanine nucleotide binding protein (G protein), alpha transducing activity polypeptide 1 (GNAT1), mRNA	ENSGALG00000028697	0.54	0.005
		SFRP4	secreted frizzled-related protein 4	ENSGALG00000012073	-1.63	0.005
		GCG	Gallus gallus glucagon (GCG), transcript variant 3, mRNA	ENSGALG00000011104	-0.64	0.005
		VTG2	Gallus gallus vitellogenin 2 (VTG2), mRNA	ENSGALG00000001863	-0.99	0.021
		PTX3	pentraxin-related protein PTX3 precursor	ENSGALG00000028284	-2.18	0.021
Positive	1 day	C7	Complement component 7	ENSGALG00000014835	1.38	0.004
Positive	2 days	NFIL3	Nuclear factor, interleukin 3 regulated (NFIL3)	ENSGALG00000015209	0.8	0
		BLIMP-1	Uncharacterized protein	ENSGALG00000015388	0.87	0.013
		LAMP3	Lysosomal-associated membrane protein 3 (LAMP3)	ENSGALG00000008759	1.09	0.013
		PTX3	Pentraxin-related protein PTX3 precursor	ENSGALG00000028284	2.32	0.013
		HAS2	Hyaluronan synthase 2	ENSGALG00000016394	1.47	0.029
		PER3	Period circadian clock 3	ENSGALG00000000573	-0.77	0.032
		SHQ1	SHQ1, H/ACA ribonucleoprotein assembly factor	ENSGALG00000007798	2.05	0.032
		ARNTL	Aryl hydrocarbon receptor nuclear translocator-like (ARNTL)	ENSGALG00000005378	0.52	0.038
		C7	Complement component 7	ENSGALG00000014835	1.47	0.048
Positive	3 days	ENSGALG00000023973	Collagen alpha-1(I) chain	ENSGALG00000023973	2.03	0
		SFRP4	Secreted frizzled-related protein 4	ENSGALG00000012073	-2.27	0
		STAT5	Signal transducer and activator of transcription 5B (STAT5B)	ENSGALG00000003282	0.97	0
		APOA1	Apolipoprotein A-I (APOA1)	ENSGALG00000007114	1.9	0
		FAM160A2	Family with sequence similarity 160, member A2	ENSGALG00000003416	1.82	0
		HAP1	Huntingtin-associated protein 1	ENSGALG00000023847	1.29	0
		VCAN	Versican (VCAN)	ENSGALG00000015624	1.64	0
		SDK2	Sidekick homolog 2 (SDK2)	ENSGALG00000004464	0.94	0
		MRC2	Mannose receptor, C type 2	ENSGALG00000000461	1.01	0
		PITPNM1	Phosphatidylinositol transfer protein, membrane-associated 1	ENSGALG00000013185	1.14	0
		ZSWIM5	Zinc finger, SWIM-type containing 5	ENSGALG00000010221	0.75	0
		ENSGALG00000003345	Uncharacterized protein	ENSGALG00000003345	1.24	0
		FXYD6	FXYD domain containing ion transport regulator 6 (FXYD6)	ENSGALG00000025937	0.8	0
		ENSGALG00000026878	Uncharacterized protein	ENSGALG00000026878	2.24	0
		ENSGALG00000014171	Uncharacterized protein	ENSGALG00000014171	1.06	0
		HPCA	Hippocalcin	ENSGALG00000003573	0.77	0
		LTBP2	Latent transforming growth factor beta binding protein 2	ENSGALG00000010258	0.91	0
		PLP1	Proteolipid protein 1 (PLP1)	ENSGALG00000000112	1.43	0
		MTSS1L	Metastasis suppressor 1-like	ENSGALG00000002467	1.09	0
		RPS26	Ribosomal protein S26	ENSGALG00000027807	1.54	0
		ESPN	Espin	ENSGALG00000000645	1.07	0
		BAI2	Brain-specific angiogenesis inhibitor 2	ENSGALG00000028634	0.84	0
		ZNF385C	Zinc finger protein 385C	ENSGALG00000003403	1.07	0
		PLEKHG3	Pleckstrin homology domain containing, family G (with RhoGef domain) member 3	ENSGALG00000026450	1.16	0
		GIT1	G protein-coupled receptor kinase interactor 1 (GIT1)	ENSGALG00000023703	1.93	0
		IGSF3	Immunoglobulin superfamily, member 3	ENSGALG00000015469	0.77	0
		NAV1	Neuron navigator 1	ENSGALG00000000362	1.13	0
		MDK	Midkine (neurite growth-promoting factor 2) (MDK)	ENSGALG00000008367	1.16	0
		ATP1B4	ATPase, Na+/K+ transporting, beta 4 polypeptide (ATP1B4)	ENSGALG00000008593	3	0
		TNPO3	Transportin 3	ENSGALG00000013823	0.96	0
		MARS	Methionyl-tRNA synthetase (MARS)	ENSGALG00000028714	1.04	0
		UNC5A	Unc-5 homolog A (C elegans)	ENSGALG00000018998	1.58	0
		PLCD4	Phospholipase C, delta 4	ENSGALG00000026687	0.57	0.001
		BSN	Bassoon presynaptic cytomatrix protein	ENSGALG00000001849	0.94	0.001
		NCOA1	Nuclear receptor coactivator 1 (NCOA1)	ENSGALG00000016617	0.59	0.001
		AES	Amino-terminal enhancer of split	ENSGALG00000029174	0.66	0.001
		FAM43A	Family with sequence similarity 43, member A	ENSGALG00000007053	2.54	0.001
		MAN2A2	Mannosidase, alpha, class 2A, member 2	ENSGALG00000008336	0.82	0.001
		SP1	Sp1 transcription factor (SP1)	ENSGALG00000028401	1.56	0.001
		FSCN2	Fascin homolog 2, actin-bundling protein, retinal (Strongylocentrotus purpuratus) (FSCN2)	ENSGALG00000023354	1.66	0.001
		BCAR1	Breast cancer anti-estrogen resistance 1	ENSGALG00000028291	1.4	0.001
		ENSGALG00000002595	Uncharacterized protein	ENSGALG00000002595	1.34	0.001
		APC2	Adenomatosis polyposis coli 2	ENSGALG00000027821	1.25	0.001
		JUP	Junction plakoglobin (JUP)	ENSGALG00000017414	0.87	0.001
		PFKM	Phosphofructokinase, muscle (PFKM)	ENSGALG00000027848	1.41	0.001
		ENSGALG00000021139	Ig lambda chain V-1 region	ENSGALG00000021139	3.75	0.001
		COL1A2	Collagen, type I, alpha 2 (COL1A2)	ENSGALG00000009641	0.87	0.001
		SPEG	SPEG complex locus	ENSGALG00000028386	0.97	0.001
		IGSF9	Immunoglobulin superfamily, member 9	ENSGALG00000022603	1.82	0.001
		NUMA1	Nuclear mitotic apparatus protein 1 (NUMA1)	ENSGALG00000001258	1	0.001
		FGFR1	fibroblast growth factor receptor 1 (FGFR1)	ENSGALG00000003311	0.62	0.001
		HAS2	hyaluronan synthase 2	ENSGALG00000016394	1.77	0.001
		TIMM50	translocase of inner mitochondrial membrane 50 homolog (S cerevisiae)	ENSGALG00000029016	1.49	0.001
		IRX6	iroquois homeobox 6	ENSGALG00000023738	1.57	0.001
		PFKL	phosphofructokinase, liver	ENSGALG00000006543	0.83	0.001
		PPIA	peptidyl-prolyl cis-trans isomerase A	ENSGALG00000028600	1.01	0.001
		ENSGALG00000025902	Uncharacterized protein	ENSGALG00000025902	1.11	0.001
		MKNK2	MAP kinase interacting serine/threonine kinase 2	ENSGALG00000003845	1.18	0.001
		B2M	Beta-2-microglobulin	ENSGALG00000002160	1.17	0.001
		OSF-2	periostin, osteoblast specific factor (POSTN)	ENSGALG00000017046	2.25	0.001
		C7	complement component 7	ENSGALG00000014835	1.22	0.001
		TUBB	tubulin, beta class I	ENSGALG00000029076	1.29	0.001
		PLEKHG5	pleckstrin homology domain containing, family G (with RhoGef domain) member 5	ENSGALG00000027476	0.85	0.001
		QARS	glutaminyl-tRNA synthetase (QARS)	ENSGALG00000006853	0.89	0.001
		MAPRE3	microtubule-associated protein, RP/EB family, member 3	ENSGALG00000026116	0.67	0.001
		HMX1	H6 family homeobox 1 (HMX1)	ENSGALG00000015600	1.33	0.001
		GNB2L1	guanine nucleotide binding protein (G protein), beta polypeptide 2-like 1 (GNB2L1)	ENSGALG00000000122	0.53	0.001
		SMIM12	small integral membrane protein 12 (SMIM12)	ENSGALG00000002526	0.8	0.001
		SLC6A8	solute carrier family 6 (neurotransmitter transporter), member 8	ENSGALG00000026545	0.94	0.001
		POLD2	polymerase (DNA directed), delta 2, accessory subunit	ENSGALG00000026234	1.26	0.001
		ENSGALG00000027694	Uncharacterized protein	ENSGALG00000027694	1.35	0.001
		HYAL2	hyaluronoglucosaminidase 2	ENSGALG00000002138	1.59	0.001
		TIMP2	TIMP metallopeptidase inhibitor 2 (TIMP2)	ENSGALG00000027070	0.74	0.001
		ENSGALG00000026609	Uncharacterized protein	ENSGALG00000026609	1.24	0.001
		CAPN15	calpain 15	ENSGALG00000002018	0.78	0.001
		RAP2B	RAP2B, member of RAS oncogene family (RAP2B)	ENSGALG00000021552	1.31	0.002
		DMTN	dematin actin binding protein	ENSGALG00000028589	0.97	0.002
		CELSR2	cadherin, EGF LAG seven-pass G-type receptor 2	ENSGALG00000028616	2.07	0.002
		ZNF609	zinc finger protein 609	ENSGALG00000002340	0.72	0.002
		RPS28	ribosomal protein S28	ENSGALG00000024398	2.26	0.002
		SYNPO	synaptopodin	ENSGALG00000027330	1.53	0.002
		BRT-1	tropomyosin 2 (beta) (TPM2)	ENSGALG00000025842	1.13	0.002
		FSD1L	fibronectin type III and SPRY domain containing 1-like	ENSGALG00000015442	-0.47	0.002
		ARHGEF11	Rho guanine nucleotide exchange factor (GEF) 11	ENSGALG00000013261	0.44	0.002
		TLE3	transducin-like enhancer of split 3 (E(sp1) homolog, Drosophila)	ENSGALG00000008120	0.77	0.002
		CYGB	cytoglobin (CYGB)	ENSGALG00000001892	1.27	0.002
		KIRREL	kin of IRRE like (Drosophila)	ENSGALG00000006259	0.83	0.002
		MAP7D1	MAP7 domain containing 1	ENSGALG00000021634	1	0.002
		SRCIN1	SRC kinase signaling inhibitor 1	ENSGALG00000009707	1.07	0.002
		BRD4	bromodomain containing 4 (BRD4)	ENSGALG00000028734	0.99	0.002
		ADD2	adducin 2 (beta)	ENSGALG00000026948	1.05	0.002
		SRL	sarcalumenin (SRL)	ENSGALG00000007782	3.16	0.002
		RBM41	RNA binding motif protein 41	ENSGALG00000004832	1.52	0.002
		GNAI2	guanine nucleotide binding protein (G protein), alpha inhibiting activity polypeptide 2 (GNAI2)	ENSGALG00000004639	0.66	0.002
		FURIN	furin (paired basic amino acid cleaving enzyme) (FURIN)	ENSGALG00000008341	0.85	0.002
		CELF3	CUGBP, Elav-like family member 3	ENSGALG00000028478	1.02	0.002
		KIF7	kinesin family member 7	ENSGALG00000006611	0.78	0.002
		RPL19	ribosomal protein L19 (RPL19)	ENSGALG00000001658	0.62	0.002
		RPLP1	ribosomal protein, large, P1 (RPLP1)	ENSGALG00000016172	1.09	0.002
		AATK	apoptosis-associated tyrosine kinase	ENSGALG00000006901	1.28	0.002
		THRA	thyroid hormone receptor, alpha (THRA)	ENSGALG00000000270	0.96	0.002
		OSBP	oxysterol binding protein	ENSGALG00000027392	0.87	0.002
		NPDC1	neural proliferation, differentiation and control, 1	ENSGALG00000009039	0.95	0.002
		TRIM3	tripartite motif containing 3	ENSGALG00000003422	1.22	0.003
		BLB1	Uncharacterized protein	ENSGALG00000000141	1.62	0.003
		IGFBP4	insulin-like growth factor binding protein 4 (IGFBP4)	ENSGALG00000028931	1.43	0.003
		DTX4	deltex homolog 4 (Drosophila)	ENSGALG00000010835	0.76	0.003
		GSE1	Gse1 coiled-coil protein	ENSGALG00000014284	1	0.003
		UBALD1	UBA-like domain containing 1	ENSGALG00000007619	0.87	0.003
		H2AFY	H2A histone family, member Y	ENSGALG00000026449	0.89	0.003
		PPIB	peptidylprolyl isomerase B (cyclophilin B) (PPIB)	ENSGALG00000002210	1.18	0.003
		GNG11	guanine nucleotide binding protein (G protein), gamma 11 (GNG11)	ENSGALG00000009517	0.65	0.003
		ENSGALG00000026930	Uncharacterized protein	ENSGALG00000026930	1.32	0.003
		RASGRF1	Ras protein-specific guanine nucleotide-releasing factor 1	ENSGALG00000008262	0.64	0.003
		ARHGAP35	Rho GTPase activating protein 35	ENSGALG00000011693	0.88	0.003
		DNMT1	DNA (cytosine-5-)-methyltransferase 1 (DNMT1)	ENSGALG00000028997	0.58	0.003
		ENSGALG00000003670		ENSGALG00000003670	1.03	0.003
		ENSGALG00000026562	Anoctamin	ENSGALG00000026562	1.04	0.003
		FAM65A	family with sequence similarity 65, member A	ENSGALG00000001809	0.91	0.003
		KCNS1	potassium voltage-gated channel, delayed-rectifier, subfamily S, member 1	ENSGALG00000004074	0.95	0.003
		LHX4	LIM homeobox 4	ENSGALG00000001735	1.5	0.003
		BCAS2	breast carcinoma amplified sequence 2 (BCAS2)	ENSGALG00000002002	0.66	0.003
		ATP5B	ATP synthase, H+ transporting, mitochondrial F1 complex, beta polypeptide (ATP5B), nuclear gene encoding mitochondrial protein	ENSGALG00000022539	0.76	0.003
		QSOX1	quiescin Q6 sulfhydryl oxidase 1 (QSOX1)	ENSGALG00000003933	1.08	0.004
		CASQ2	calsequestrin 2 (cardiac muscle) (CASQ2), nuclear gene encoding mitochondrial protein	ENSGALG00000015018	2.64	0.004
		SPIRE2	spire-type actin nucleation factor 2	ENSGALG00000000521	1.18	0.004
		AANAT	aralkylamine N-acetyltransferase (AANAT)	ENSGALG00000001955	1.63	0.004
		ENSGALG00000026539	Uncharacterized protein	ENSGALG00000026539	1.8	0.004
		MMP15	matrix metallopeptidase 15 (membrane-inserted)	ENSGALG00000001007	0.97	0.004
		KANSL1	KAT8 regulatory NSL complex subunit 1	ENSGALG00000000603	0.68	0.004
		RARRES2	retinoic acid receptor responder (tazarotene induced) 2 (RARRES2), transcript variant 2	ENSGALG00000004909	0.86	0.004
		RPS29	ribosomal protein S29 (RPS29)	ENSGALG00000012229	1.45	0.004
		CORO7	coronin 7 (CORO7)	ENSGALG00000007801	1.01	0.004
		CYTH1	cytohesin 1 (CYTH1)	ENSGALG00000007093	0.51	0.004
		ZNF814	zinc finger protein 814	ENSGALG00000004898	1.39	0.004
		ACTN4	actinin, alpha 4 (ACTN4)	ENSGALG00000014305	0.67	0.004
		TEX264	testis expressed 264	ENSGALG00000003832	0.84	0.004
		COL2A1	Collagen alpha-1(II) chain	ENSGALG00000013587	0.82	0.004
		ENSGALG00000027568	Uncharacterized protein	ENSGALG00000027568	1.72	0.004
		RBPMS	RNA binding protein with multiple splicing	ENSGALG00000010291	0.72	0.004
		SREBP-1	sterol regulatory element binding transcription factor 1 (SREBF1)	ENSGALG00000027188	1.31	0.004
		ZNF513	zinc finger protein 513	ENSGALG00000016516	1.64	0.004
		GATAD2B	GATA zinc finger domain containing 2B	ENSGALG00000029154	0.95	0.004
		SOX8	SRY (sex determining region Y)-box 8 (SOX8)	ENSGALG00000005263	1.26	0.005
		DCTN2	dynactin 2 (p50)	ENSGALG00000029062	1.71	0.005
		CADM3	cell adhesion molecule 3	ENSGALG00000028795	0.51	0.005
		PAM	peptidylglycine alpha-amidating monooxygenase	ENSGALG00000015256	-0.34	0.005
		SFXN3	sideroflexin 3	ENSGALG00000023621	0.74	0.005
		CASKIN1	CASK interacting protein 1	ENSGALG00000005844	0.67	0.005
		RAI2	retinoic acid induced 2	ENSGALG00000016538	1.03	0.005
		RARA	retinoic acid receptor, alpha	ENSGALG00000005629	1.05	0.005
		CKMT1A	creatine kinase, mitochondrial 1A (CKMT1A), nuclear gene encoding mitochondrial protein	ENSGALG00000008352	0.75	0.005
		ENSGALG00000001035	Uncharacterized protein	ENSGALG00000001035	0.52	0.005
		NPTXR	neuronal pentraxin receptor	ENSGALG00000012183	0.77	0.005
		NTNG2	netrin G2	ENSGALG00000003677	0.59	0.005
		TRIM9	tripartite motif containing 9	ENSGALG00000012367	0.58	0.005
		LAMTOR2	late endosomal/lysosomal adaptor, MAPK and MTOR activator 2	ENSGALG00000018760	1.82	0.005
		PIN4	protein (peptidylprolyl cis/trans isomerase) NIMA-interacting, 4 (parvulin)	ENSGALG00000003878	1.67	0.005
		MYBPC1	myosin binding protein C, slow type	ENSGALG00000012783	2.66	0.005
		LOXL1	lysyl oxidase-like 1	ENSGALG00000028247	1.22	0.005
		OGDH	oxoglutarate (alpha-ketoglutarate) dehydrogenase (lipoamide) (OGDH), nuclear gene encoding mitochondrial protein	ENSGALG00000014155	0.63	0.005
		MRPS21	mitochondrial ribosomal protein S21 (MRPS21), nuclear gene encoding mitochondrial protein	ENSGALG00000000456	2.35	0.005
		CFD	complement factor D (adipsin)	ENSGALG00000027497	1.62	0.005
		RPUSD1	RNA pseudouridylate synthase domain containing 1	ENSGALG00000005315	0.6	0.005
		ENSGALG00000016514	Uncharacterized protein	ENSGALG00000016514	0.83	0.005
		CXCR4	chemokine (C-X-C motif) receptor 4 (CXCR4)	ENSGALG00000012357	-0.58	0.005
		LLGL1	lethal giant larvae homolog 1 (Drosophila)	ENSGALG00000014408	1.41	0.006
		FOXO6	forkhead box O6	ENSGALG00000026153	1.54	0.006
		ZNF362	zinc finger protein 362	ENSGALG00000026558	1.21	0.006
		LAMC3	laminin, gamma 3	ENSGALG00000003852	0.86	0.006
		MAF1	MAF1 homolog (S cerevisiae)	ENSGALG00000028933	0.67	0.006
		TMEM198	transmembrane protein 198	ENSGALG00000018803	1.28	0.006
		PGAP3	post-GPI attachment to proteins 3	ENSGALG00000022030	2.02	0.006
		ATP5D	ATP synthase, H+ transporting, mitochondrial F1 complex, delta subunit	ENSGALG00000026108	0.62	0.006
		AGRN	agrin (AGRN)	ENSGALG00000002041	0.49	0.006
		MAB21L1	mab-21-like 1 (C elegans) (MAB21L1)	ENSGALG00000017059	0.72	0.006
		RXRA	retinoid X receptor, alpha	ENSGALG00000002626	0.84	0.006
		PTX3	pentraxin-related protein PTX3 precursor	ENSGALG00000028284	1.72	0.006
		ENSGALG00000026433	Uncharacterized protein	ENSGALG00000026433	1.22	0.006
		SRRM3	serine/arginine repetitive matrix 3	ENSGALG00000001932	0.77	0.007
		CS	citrate synthase	ENSGALG00000026880	0.93	0.007
		CGN	cingulin	ENSGALG00000000920	1.34	0.007
		GPX1	glutathione peroxidase 1 (GPX1)	ENSGALG00000028204	1.6	0.007
		DES	desmin	ENSGALG00000011306	1.71	0.007
		OTUB1	OTU domain, ubiquitin aldehyde binding 1	ENSGALG00000028003	1.58	0.007
		NUDCD3	NudC domain containing 3	ENSGALG00000014154	0.84	0.007
		PRDM8	PR domain containing 8	ENSGALG00000026560	1.25	0.007
		TESK1	testis-specific kinase 1	ENSGALG00000027658	1.16	0.007
		ACTA1	actin, alpha 1, skeletal muscle (ACTA1)	ENSGALG00000011086	3.77	0.007
		FZD1	frizzled family receptor 1 (FZD1)	ENSGALG00000009064	0.66	0.007
		TPP1	tripeptidyl peptidase I	ENSGALG00000022706	1.28	0.007
		BHLHE40	basic helix-loop-helix family, member e40 (BHLHE40)	ENSGALG00000008308	1.21	0.007
		AIP	aryl hydrocarbon receptor interacting protein (AIP)	ENSGALG00000013188	1.12	0.007
		SAMD14	sterile alpha motif domain containing 14	ENSGALG00000028114	1.9	0.007
		NPTX1	neuronal pentraxin I	ENSGALG00000017418	0.87	0.007
		FBXO42	F-box protein 42	ENSGALG00000003731	0.57	0.007
		UCKL1	zinc finger protein 512B isoform 3	ENSGALG00000028231	1.32	0.007
		GPX3	glutathione peroxidase 3 precursor	ENSGALG00000004521	0.65	0.007
		MYBPC3	myosin binding protein C, cardiac	ENSGALG00000008148	3.34	0.007
		RPL35	60S ribosomal protein L35	ENSGALG00000001039	0.45	0.007
		CWF19L2	CWF19-like 2, cell cycle control (S pombe)	ENSGALG00000017171	-0.63	0.007
		CTDSP1	CTD (carboxy-terminal domain, RNA polymerase II, polypeptide A) small phosphatase 1	ENSGALG00000027768	1.12	0.007
		MYH15	myosin, heavy chain 15 (MYH15)	ENSGALG00000015358	3.54	0.008
		ENSGALG00000029017	Uncharacterized protein	ENSGALG00000029017	1.93	0.008
		OGN	osteoglycin (OGN)	ENSGALG00000026736	1.47	0.008
		SEZ6	seizure related 6 homolog (mouse)	ENSGALG00000026431	0.84	0.008
		SLC15A2	solute carrier family 15 (oligopeptide transporter), member 2	ENSGALG00000011671	-0.49	0.008
		IDH2	isocitrate dehydrogenase 2 (NADP+), mitochondrial (IDH2), nuclear gene encoding mitochondrial protein	ENSGALG00000022565	1.14	0.008
		TMEM56	transmembrane protein 56 (TMEM56)	ENSGALG00000005580	-0.64	0.008
		SBF1	SET binding factor 1	ENSGALG00000012438	0.44	0.008
		mir-7474	gga-mir-7474	ENSGALG00000026366	3.73	0.008
		KIAA0513	KIAA0513	ENSGALG00000025938	0.48	0.008
		RYR2	ryanodine receptor 2 (cardiac)	ENSGALG00000010812	-0.37	0.008
		CACNA1S	calcium channel, voltage-dependent, L type, alpha 1S subunit	ENSGALG00000000730	2.69	0.008
		PMEL	melanocyte protein PMEL precursor	ENSGALG00000014634	1.4	0.009
		TBX2	T-box 2	ENSGALG00000023577	0.73	0.009
		C15orf59	chromosome 15 open reading frame 59	ENSGALG00000001716	1.39	0.009
		KANSL2	KAT8 regulatory NSL complex subunit 2	ENSGALG00000028597	1.62	0.009
		RDH8	retinol dehydrogenase 8 (all-trans)	ENSGALG00000027818	1.63	0.009
		ENSGALG00000026679	Uncharacterized protein	ENSGALG00000026679	1.37	0.009
		RXRG	retinoid X receptor, gamma (RXRG)	ENSGALG00000003406	0.55	0.009
		MYO18A	myosin XVIIIA	ENSGALG00000003741	0.88	0.009
		ACTC1	actin, alpha, cardiac muscle 1 (ACTC1)	ENSGALG00000009844	2.62	0.009
		FAAH2	fatty acid amide hydrolase 2	ENSGALG00000028084	1	0.009
		GRIN2C	glutamate receptor, ionotropic, N-methyl D-aspartate 2C	ENSGALG00000027415	0.9	0.009
		CIAO1	cytosolic iron-sulfur protein assembly 1	ENSGALG00000027576	2	0.009
		ENSGALG00000021636	Uncharacterized protein	ENSGALG00000021636	1.11	0.009
		AGAP3	ArfGAP with GTPase domain, ankyrin repeat and PH domain 3	ENSGALG00000013341	1.01	0.009
		SHANK3	SH3 and multiple ankyrin repeat domains 3	ENSGALG00000026110	0.46	0.009
		RLTPR	RGD motif, leucine rich repeats, tropomodulin domain and proline-rich containing	ENSGALG00000021442	1.09	0.009
		ZFAND2B	zinc finger, AN1-type domain 2B	ENSGALG00000028757	2.01	0.009
		EMC4	ER membrane protein complex subunit 4	ENSGALG00000027181	1.44	0.01
		RIMS3	regulating synaptic membrane exocytosis 3	ENSGALG00000003174	1.42	0.01
		CA14	carbonic anhydrase XIV	ENSGALG00000028764	1.44	0.01
		PHC2	polyhomeotic homolog 2 (Drosophila)	ENSGALG00000025930	1.57	0.01
		MRPL54	mitochondrial ribosomal protein L54	ENSGALG00000027611	1.34	0.01
		FLII	flightless I homolog (Drosophila) (FLII)	ENSGALG00000004997	0.41	0.01
		AMPD2	adenosine monophosphate deaminase 2	ENSGALG00000026860	0.48	0.01
		ENSGALG00000023447	Uncharacterized protein	ENSGALG00000023447	0.74	0.01
		C20orf112	chromosome 20 open reading frame 112	ENSGALG00000028251	0.53	0.01
		ENSGALG00000027182	Uncharacterized protein	ENSGALG00000027182	1.19	0.01
		mir-6643	gga-mir-6643	ENSGALG00000028590	1.41	0.01
		PLEKHA6	pleckstrin homology domain containing, family A member 6	ENSGALG00000000587	0.47	0.01
		BRD2	bromodomain containing 2 (BRD2)	ENSGALG00000000156	0.58	0.01
		CSPG5	chondroitin sulfate proteoglycan 5 precursor	ENSGALG00000028443	0.74	0.01
		ENSGALG00000012753	Uncharacterized protein	ENSGALG00000012753	1.2	0.01
		NPRL2	nitrogen permease regulator-like 2 (S cerevisiae)	ENSGALG00000002131	0.86	0.011
		FOXC2	forkhead box C2 (MFH-1, mesenchyme forkhead 1) (FOXC2)	ENSGALG00000022940	1.37	0.011
		ENSGALG00000026833	Uncharacterized protein	ENSGALG00000026833	0.75	0.011
		C3orf33	chromosome 3 open reading frame 33	ENSGALG00000026293	-0.99	0.011
		CPLX3	complexin 3 (CPLX3)	ENSGALG00000026446	0.74	0.011
		TNK2	tyrosine kinase, non-receptor, 2	ENSGALG00000027983	0.75	0.011
		RPLP0	60S acidic ribosomal protein P0	ENSGALG00000023294	0.42	0.011
		ZDHHC5	zinc finger, DHHC-type containing 5 (ZDHHC5)	ENSGALG00000007362	0.57	0.011
		ZDHHC9	zinc finger, DHHC-type containing 9	ENSGALG00000003962	0.43	0.012
		COL3A1	collagen, type III, alpha 1 (COL3A1)	ENSGALG00000002552	0.64	0.012
		ARHGAP44	Rho GTPase activating protein 44	ENSGALG00000001311	0.6	0.012
		KANK3	KN motif and ankyrin repeat domains 3	ENSGALG00000000621	1.11	0.012
		ARHGDIG	Rho GDP dissociation inhibitor (GDI) gamma	ENSGALG00000025911	1.6	0.012
		OLIG2	oligodendrocyte transcription factor 3 (OLIG3)	ENSGALG00000027381	1.4	0.012
		ENSGALG00000027352	Uncharacterized protein	ENSGALG00000027352	1.95	0.012
		SYDE1	synapse defective 1, Rho GTPase, homolog 1 (C elegans)	ENSGALG00000026662	1.65	0.012
		BMP3	bone morphogenetic protein 3 (BMP3)	ENSGALG00000010898	1.33	0.012
		GNAT1	guanine nucleotide binding protein (G protein), alpha transducing activity polypeptide 1 (GNAT1)	ENSGALG00000028697	0.41	0.012
		GLRA4	glycine receptor, alpha 4	ENSGALG00000004936	0.71	0.012
		CYBA	cytochrome b-245, alpha polypeptide	ENSGALG00000026172	1.64	0.012
		NEUROD1	neurogenic differentiation 1 (NEUROD1)	ENSGALG00000008908	1.34	0.013
		QPCTL	glutaminyl-peptide cyclotransferase-like	ENSGALG00000017621	1.23	0.013
		AP1B1	adaptor-related protein complex 1, beta 1 subunit	ENSGALG00000008138	0.48	0.013
		STIP1	stress-induced-phosphoprotein 1	ENSGALG00000026546	1.34	0.013
		APBA3	amyloid beta (A4) precursor protein-binding, family A, member 3	ENSGALG00000000740	1.24	0.013
		SLC7A4	solute carrier family 7, member 4	ENSGALG00000002204	0.9	0.013
		PTPRN	protein tyrosine phosphatase, receptor type, N	ENSGALG00000026093	1.14	0.013
		TNIP1	TNFAIP3 interacting protein 1	ENSGALG00000004496	0.58	0.013
		NDUFV1	NADH dehydrogenase	ENSGALG00000026732	1.11	0.013
		GPR61	G protein-coupled receptor 61	ENSGALG00000026355	1.05	0.013
		COMMD4	COMM domain containing 4 (COMMD4), transcript variant 1	ENSGALG00000001572	1.64	0.013
		ENSGALG00000003693	Uncharacterized protein	ENSGALG00000003693	0.44	0.013
		KIAA0100	KIAA0100	ENSGALG00000003766	0.46	0.013
		SNED1	sushi, nidogen and EGF-like domains 1	ENSGALG00000006039	0.8	0.013
		LOXL2	lysyl oxidase-like 2	ENSGALG00000000402	1.42	0.013
		ZNF628	zinc finger protein 628	ENSGALG00000029178	0.93	0.013
		ANKRD13B	ankyrin repeat domain 13B	ENSGALG00000026000	0.94	0.013
		STRIP1	striatin interacting protein 1	ENSGALG00000026936	0.51	0.014
		MAST3	microtubule associated serine/threonine kinase 3	ENSGALG00000003499	0.54	0.014
		ARL4C	ADP-ribosylation factor-like 4C	ENSGALG00000021021	1.19	0.014
		ENSGALG00000002749	Uncharacterized protein	ENSGALG00000002749	0.97	0.014
		COL8A2	collagen, type VIII, alpha 2	ENSGALG00000002298	1.02	0.014
		SH2D3C	SH2 domain containing 3C	ENSGALG00000005036	0.93	0.015
		CCDC61	coiled-coil domain containing 61 (CCDC61)	ENSGALG00000006714	1.02	0.015
		FUS	fused in sarcoma (FUS)	ENSGALG00000027042	1.69	0.015
		HBAD	alpha-D-globin (HBAD)	ENSGALG00000007463	1.63	0.015
		TMEM59L	transmembrane protein 59-like	ENSGALG00000021620	1.11	0.015
		RPS17	ribosomal protein S17-like (RPS17L)	ENSGALG00000002157	0.73	0.015
		BCAP31	B-cell receptor-associated protein 31	ENSGALG00000027912	1.41	0.015
		SNTA1	syntrophin, alpha 1	ENSGALG00000026824	1.55	0.015
		ENSGALG00000021525	Uncharacterized protein	ENSGALG00000021525	1.43	0.015
		ADAM11	ADAM metallopeptidase domain 11	ENSGALG00000027622	0.73	0.016
		DCTN1	dynactin 1	ENSGALG00000026129	0.49	0.016
		HTR1B	5-hydroxytryptamine (serotonin) receptor 1B (HTR1B)	ENSGALG00000015895	0.64	0.016
		ESAM	endothelial cell adhesion molecule	ENSGALG00000000957	1.7	0.016
		IGFBP5	Uncharacterized protein	ENSGALG00000011468	1.67	0.016
		PVALB1	parvalbumin (PVALB)	ENSGALG00000012522	1.07	0.016
		MYOM2	myomesin (M-protein) 2, 165kDa (MYOM2)	ENSGALG00000016342	2	0.016
		SMTNL2	smoothelin-like 2	ENSGALG00000006069	1.02	0.016
		CNTNAP1	contactin associated protein 1	ENSGALG00000003123	0.52	0.016
		TUBB3	tubulin, beta 3 class III (TUBB3)	ENSGALG00000000059	0.8	0.016
		NHS	Nance-Horan syndrome (congenital cataracts and dental anomalies)	ENSGALG00000016543	0.4	0.016
		PHB2	prohibitin 2 (PHB2)	ENSGALG00000014567	0.47	0.016
		EPN3	epsin 3	ENSGALG00000023279	0.77	0.016
		IGJ	immunoglobulin J polypeptide, linker protein for immunoglobulin alpha and mu polypeptides (IGJ)	ENSGALG00000011551	2.24	0.016
		CORO6	coronin 6	ENSGALG00000028949	1.45	0.016
		KCNH2	potassium voltage-gated channel, subfamily H (eag-related), member 2	ENSGALG00000027043	0.86	0.016
		STXBP5L	syntaxin binding protein 5-like	ENSGALG00000014941	-0.31	0.017
		USF1	upstream transcription factor 1 (USF1)	ENSGALG00000000043	1.18	0.017
		RAPGEF3	Rap guanine nucleotide exchange factor (GEF) 3	ENSGALG00000006348	1.5	0.017
		SPOCK2	sparc/osteonectin, cwcv and kazal-like domains proteoglycan (testican) 2	ENSGALG00000027450	1.58	0.017
		COL4A6	collagen, type IV, alpha 6	ENSGALG00000008266	0.61	0.017
		SCAP	SREBF chaperone	ENSGALG00000005072	0.39	0.017
		C9orf172	chromosome 9 open reading frame 172	ENSGALG00000028823	1.36	0.017
		NRXN3	neurexin 3 isoform a precursor	ENSGALG00000010518	-0.37	0.017
		RPS15	ribosomal protein S15 (RPS15)	ENSGALG00000015195	0.55	0.017
		ARFRP1	ADP-ribosylation factor related protein 1	ENSGALG00000006101	-0.49	0.017
		ENSGALG00000026530	Uncharacterized protein	ENSGALG00000026530	1.16	0.017
		ENSGALG00000028166	Uncharacterized protein	ENSGALG00000028166	1.16	0.017
		MRPL10	mitochondrial ribosomal protein L10	ENSGALG00000014387	1.15	0.017
		mir-1466	Thy-1 cell surface antigen (THY1)	ENSGALG00000006751	0.5	0.017
		PTK7	PTK7 protein tyrosine kinase 7 (PTK7)	ENSGALG00000008609	0.5	0.017
		RAB11FIP5	RAB11 family interacting protein 5 (class I)	ENSGALG00000016092	0.52	0.017
		CROCC	ciliary rootlet coiled-coil, rootletin	ENSGALG00000027085	0.88	0.017
		TADA3	transcriptional adaptor 3	ENSGALG00000006688	1.23	0.017
		PRKCQ	protein kinase C, theta	ENSGALG00000023876	1.22	0.017
		TRAPPC5	trafficking protein particle complex 5 (TRAPPC5)	ENSGALG00000028618	1.88	0.017
		REV1	REV1, polymerase (DNA directed) (REV1)	ENSGALG00000016766	-0.43	0.017
		ENSGALG00000027695	Uncharacterized protein	ENSGALG00000027695	0.73	0.018
		CACNB1	calcium channel, voltage-dependent, beta 1 subunit	ENSGALG00000025788	1.11	0.018
		CISH	cytokine inducible SH2-containing protein (CISH)	ENSGALG00000002260	1.72	0.018
		BCAN	brevican	ENSGALG00000013237	1.07	0.018
		ERMN	ermin, ERM-like protein	ENSGALG00000020575	0.38	0.018
		GPRC5C	G protein-coupled receptor, family C, group 5, member C	ENSGALG00000021362	1.18	0.018
		MAB21L2	mab-21-like 2 (C elegans) (MAB21L2)	ENSGALG00000010071	1.79	0.018
		SNCB	synuclein, beta (SNCB)	ENSGALG00000021542	0.95	0.018
		SLC25A4	solute carrier family 25 (mitochondrial carrier; adenine nucleotide translocator), member 4 (SLC25A4), nuclear gene encoding mitochondrial protein	ENSGALG00000010614	1.79	0.018
		ENSGALG00000007954	Uncharacterized protein	ENSGALG00000007954	0.73	0.018
		ENSGALG00000027938	Uncharacterized protein	ENSGALG00000027938	1.05	0.018
		TMEM203	transmembrane protein 203	ENSGALG00000008925	1.47	0.018
		ENSGALG00000001242	Uncharacterized protein	ENSGALG00000001242	1.53	0.019
		MAPK8IP2	mitogen-activated protein kinase 8 interacting protein 2	ENSGALG00000026023	1.41	0.019
		SIX6	SIX homeobox 6 (SIX6)	ENSGALG00000020359	0.78	0.019
		MRPL51	mitochondrial ribosomal protein L51 (MRPL51), nuclear gene encoding mitochondrial protein	ENSGALG00000014435	0.61	0.019
		POLG	polymerase (DNA directed), gamma	ENSGALG00000006641	0.73	0.019
		SEZ6L	seizure related 6 homolog (mouse)-like	ENSGALG00000005577	0.4	0.019
		SLC12A5	solute carrier family 12 (potassium/chloride transporter), member 5	ENSGALG00000006930	0.62	0.019
		SAMD11	sterile alpha motif domain containing 11 (SAMD11)	ENSGALG00000002228	0.45	0.019
		PDE6G	phosphodiesterase 6G, cGMP-specific, rod, gamma (PDE6G)	ENSGALG00000004514	0.77	0.019
		TYK2	tyrosine kinase 2	ENSGALG00000026087	1.14	0.019
		CDK5R2	cyclin-dependent kinase 5, regulatory subunit 2 (p39)	ENSGALG00000025729	1.27	0.019
		IDH3G	isocitrate dehydrogenase 3 (NAD+) gamma	ENSGALG00000026988	1.79	0.019
		ENSGALG00000028269	Uncharacterized protein	ENSGALG00000028269	0.97	0.019
		MASP1	mannan-binding lectin serine peptidase 1 (C4/C2 activating component of Ra-reactive factor) (MASP1)	ENSGALG00000007419	1.11	0.02
		SYT7	synaptotagmin VII	ENSGALG00000013302	0.67	0.02
		COL5A1	collagen alpha-1(V) chain precursor	ENSGALG00000002546	0.41	0.02
		FGR	feline Gardner-Rasheed sarcoma viral oncogene homolog	ENSGALG00000004785	1.47	0.02
		ABHD8	abhydrolase domain containing 8	ENSGALG00000028826	0.68	0.02
		RHOU	ras homolog family member U	ENSGALG00000025738	0.61	0.02
		MYOM1	myomesin 1, 185kDa (MYOM1)	ENSGALG00000014847	2.13	0.02
		KIFC3	kinesin family member C3	ENSGALG00000001020	0.94	0.02
		ENSGALG00000028903	Uncharacterized protein	ENSGALG00000028903	1.04	0.02
		PITX2	paired-like homeodomain 2 (PITX2)	ENSGALG00000026881	1.13	0.02
		TAGLN2	transgelin 2	ENSGALG00000028472	0.8	0.02
		RAX1	retina and anterior neural fold homeobox (RAX)	ENSGALG00000025954	1.13	0.02
		DSCAML1	Down syndrome cell adhesion molecule like 1	ENSGALG00000007314	0.51	0.02
		OLFML3	olfactomedin-like 3 (OLFML3)	ENSGALG00000001956	1.24	0.021
		ENSGALG00000029120	Uncharacterized protein	ENSGALG00000029120	-0.43	0.021
		ABCA7	ATP-binding cassette, sub-family A (ABC1), member 7	ENSGALG00000002453	0.76	0.021
		CUTA	cutA divalent cation tolerance homolog (E coli)	ENSGALG00000001620	0.6	0.021
		DBI	diazepam binding inhibitor (GABA receptor modulator, acyl-CoA binding protein) (DBI)	ENSGALG00000012112	0.63	0.021
		RNPEP	arginyl aminopeptidase (aminopeptidase B)	ENSGALG00000000374	1.13	0.021
		PPIL1	peptidylprolyl isomerase (cyclophilin)-like 1	ENSGALG00000028189	1.85	0.021
		ENSGALG00000001969	Uncharacterized protein	ENSGALG00000001969	1.5	0.021
		TNNT3	troponin T type 3 (skeletal, fast) (TNNT3)	ENSGALG00000006572	3.43	0.021
		ENSGALG00000017589	Uncharacterized protein	ENSGALG00000017589	0.81	0.021
		MFGE8	lactadherin isoform 2 precursor	ENSGALG00000006702	0.36	0.021
		ENSGALG00000027588	Uncharacterized protein	ENSGALG00000027588	0.87	0.021
		MIEN1	migration and invasion enhancer 1	ENSGALG00000026328	0.96	0.021
		ATN1	atrophin 1	ENSGALG00000014554	0.45	0.021
		MGAT5B	mannosyl (alpha-1,6-)-glycoprotein beta-1,6-N-acetyl-glucosaminyltransferase, isozyme B	ENSGALG00000001740	0.51	0.021
		SEMA4B	sema domain, immunoglobulin domain (Ig), transmembrane domain (TM) and short cytoplasmic domain, (semaphorin) 4B	ENSGALG00000008297	1.53	0.021
		PPP2R2C	protein phosphatase 2, regulatory subunit B, gamma	ENSGALG00000015531	-0.35	0.021
		MAP4	microtubule-associated protein 4	ENSGALG00000004938	0.45	0.021
		EF1A	eukaryotic translation elongation factor 1 alpha 2 (EEF1A2)	ENSGALG00000005843	0.47	0.021
		TLN1	talin 1 (TLN1)	ENSGALG00000002548	0.49	0.021
		LRP1	low density lipoprotein receptor-related protein 1	ENSGALG00000027308	0.55	0.021
		ACVRL1	activin A receptor type II-like 1	ENSGALG00000018934	1.18	0.021
		SAG	S-antigen; retina and pineal gland (arrestin)	ENSGALG00000001696	-0.37	0.021
		SLC9A3R2	Uncharacterized protein	ENSGALG00000005608	0.42	0.021
		PCGF6	polycomb group ring finger 6	ENSGALG00000008230	-0.36	0.021
		ENSGALG00000025800	Uncharacterized protein	ENSGALG00000025800	0.51	0.021
		ADRBK1	adrenergic, beta, receptor kinase 1 (ADRBK1)	ENSGALG00000018763	0.62	0.021
		ENSGALG00000021694	Uncharacterized protein	ENSGALG00000021694	0.52	0.022
		PYGL	phosphorylase, glycogen, liver (PYGL)	ENSGALG00000012365	0.51	0.022
		SREBF2	sterol regulatory element binding transcription factor 2	ENSGALG00000011916	0.38	0.022
		EPDR1	ependymin related 1	ENSGALG00000012069	-0.34	0.022
		LHFPL4	lipoma HMGIC fusion partner-like 4	ENSGALG00000028092	1.07	0.022
		LRTM1	leucine-rich repeats and transmembrane domains 1	ENSGALG00000005404	-0.41	0.022
		UNC13A	unc-13 homolog A (C elegans)	ENSGALG00000026462	0.4	0.022
		PDE3A	phosphodiesterase 3A, cGMP-inhibited	ENSGALG00000013143	-0.39	0.022
		CUX2	cut-like homeobox 2	ENSGALG00000004598	0.64	0.022
		NACAD	NAC alpha domain containing	ENSGALG00000005603	0.4	0.022
		ANO1	Anoctamin	ENSGALG00000026419	0.82	0.022
		COQ4	coenzyme Q4	ENSGALG00000004927	1.09	0.022
		TIE1	tyrosine kinase with immunoglobulin-like and EGF-like domains 1	ENSGALG00000009957	0.53	0.022
		LHX3	LIM homeobox 3 (LHX3)	ENSGALG00000003928	0.9	0.022
		TMUB1	transmembrane and ubiquitin-like domain containing 1	ENSGALG00000028513	2.08	0.023
		SPTB	spectrin, beta, erythrocytic	ENSGALG00000003386	0.74	0.023
		ENSGALG00000027059	Uncharacterized protein	ENSGALG00000027059	2.1	0.023
		CRELD1	cysteine-rich with EGF-like domains 1	ENSGALG00000028605	1.4	0.023
		NPR3	natriuretic peptide receptor C/guanylate cyclase C (atrionatriuretic peptide receptor C)	ENSGALG00000017405	0.72	0.023
		VTN	vitronectin (VTN)	ENSGALG00000003589	0.49	0.023
		RPL15	ribosomal protein L15	ENSGALG00000011290	0.49	0.023
		ENSGALG00000021686	Uncharacterized protein	ENSGALG00000021686	1.17	0.023
		LAMB2	laminin, beta 2 (laminin S) (LAMB2)	ENSGALG00000006802	1.58	0.023
		SELM	selenoprotein M precursor	ENSGALG00000025972	0.61	0.023
		MAPT	Microtubule-associated protein	ENSGALG00000000625	0.37	0.023
		RNF44	ring finger protein 44	ENSGALG00000026443	0.99	0.024
		LOXL3	lysyl oxidase-like 3	ENSGALG00000013254	1.21	0.024
		GAA	glucosidase, alpha; acid	ENSGALG00000004181	0.92	0.024
		ADAM12	ADAM metallopeptidase domain 12 (ADAM12), transcript variant 1	ENSGALG00000012740	0.92	0.024
		NDRG4	NDRG family member 4	ENSGALG00000000874	0.41	0.025
		BHLHE23	basic helix-loop-helix family, member e23 (BHLHE23)	ENSGALG00000005718	1.39	0.025
		NOTCH1	notch 1	ENSGALG00000002375	0.69	0.025
		MRPL2	mitochondrial ribosomal protein L2	ENSGALG00000008597	1.25	0.025
		ZNF335	zinc finger protein 335 (ZNF335)	ENSGALG00000006902	0.39	0.025
		SLC43A3	solute carrier family 43, member 3	ENSGALG00000020479	0.68	0.025
		SPHK1	sphingosine kinase 1	ENSGALG00000023541	1.36	0.025
		ALDOC	aldolase C, fructose-bisphosphate (ALDOC)	ENSGALG00000026077	0.71	0.026
		KLF10	Kruppel-like factor 10	ENSGALG00000016063	1.1	0.026
		CIP1	cdk inhibitor CIP1 (p21) (CIP1)	ENSGALG00000028318	0.73	0.026
		ST3GAL2	ST3 beta-galactoside alpha-2,3-sialyltransferase 2 (ST3GAL2)	ENSGALG00000002651	1.23	0.026
		CDH22	cadherin 22, type 2	ENSGALG00000007211	0.48	0.026
		ENSGALG00000017336	Uncharacterized protein	ENSGALG00000017336	0.75	0.026
		RPL23A	ribosomal protein L23a	ENSGALG00000003966	0.45	0.026
		NID2	nidogen 2 (osteonidogen)	ENSGALG00000012394	0.78	0.026
		mir-6579-2	gga-mir-6579-2	ENSGALG00000026394	1.44	0.027
		B4GALT2	UDP-Gal:betaGlcNAc beta 1,4- galactosyltransferase, polypeptide 2 (B4GALT2)	ENSGALG00000010094	0.53	0.027
		AJAP1	adherens junctions associated protein 1	ENSGALG00000027265	0.76	0.027
		ENSGALG00000004931	Uncharacterized protein	ENSGALG00000004931	0.76	0.027
		DAG1	dystroglycan 1 (dystrophin-associated glycoprotein 1) (DAG1)	ENSGALG00000027710	0.61	0.027
		RCC1	regulator of chromosome condensation 1	ENSGALG00000027784	1.34	0.027
		SLC9A8	sodium/hydrogen exchanger 8	ENSGALG00000008045	-0.33	0.027
		COX6A1	cytochrome c oxidase subunit VIa polypeptide 1 (COX6A1), nuclear gene encoding mitochondrial protein, transcript variant 1	ENSGALG00000007205	0.46	0.027
		TUSC2	tumor suppressor candidate 2	ENSGALG00000027401	0.72	0.027
		SARS	seryl-tRNA synthetase (SARS)	ENSGALG00000026809	0.86	0.027
		SUPT5H	suppressor of Ty 5 homolog (S cerevisiae) (SUPT5H)	ENSGALG00000014301	0.46	0.027
		PTPRH	protein tyrosine phosphatase, receptor type, H	ENSGALG00000000584	0.71	0.028
		ENTHD2	ENTH domain containing 2	ENSGALG00000006883	1.46	0.028
		NPHP4	nephronophthisis 4	ENSGALG00000000966	0.76	0.028
		DHX30	DEAH (Asp-Glu-Ala-His) box polypeptide 30 (DHX30), nuclear gene encoding mitochondrial protein	ENSGALG00000005027	0.35	0.029
		DBNDD1	dysbindin (dystrobrevin binding protein 1) domain containing 1	ENSGALG00000000528	1.24	0.029
		COCH	coagulation factor C homolog, cochlin (Limulus polyphemus) (COCH)	ENSGALG00000009920	0.57	0.029
		ILF2	interleukin enhancer binding factor 2	ENSGALG00000011570	0.4	0.029
		WDR61	WD repeat domain 61 (WDR61)	ENSGALG00000003221	-0.58	0.03
		XYLT2	xylosyltransferase II (XYLT2)	ENSGALG00000007702	0.59	0.03
		CDH3	cadherin 3, type 1, P-cadherin (placental)	ENSGALG00000026291	0.78	0.03
		TMEM88	transmembrane protein 88	ENSGALG00000001534	1.06	0.03
		RX1	retina and anterior neural fold homeobox 2 (RAX2)	ENSGALG00000013431	0.82	0.03
		NKIRAS2	NFKB inhibitor interacting Ras-like 2 (NKIRAS2)	ENSGALG00000028971	0.93	0.03
		COL18A1	collagen, type XVIII, alpha 1 (COL18A1)	ENSGALG00000004338	0.92	0.03
		SGSH	N-sulfoglucosamine sulfohydrolase	ENSGALG00000007027	1.1	0.03
		IPO13	importin 13 (IPO13)	ENSGALG00000010087	0.36	0.03
		TFPI2	tissue factor pathway inhibitor 2	ENSGALG00000009512	0.64	0.031
		MRPL24	mitochondrial ribosomal protein L24	ENSGALG00000013242	1.08	0.031
		MLLT6	myeloid/lymphoid or mixed-lineage leukemia (trithorax homolog, Drosophila); translocated to, 6	ENSGALG00000001574	0.35	0.031
		ENSGALG00000016249	Uncharacterized protein	ENSGALG00000016249	1.64	0.031
		ENSGALG00000009600	Uncharacterized protein	ENSGALG00000009600	1.75	0.031
		FASTK	Fas-activated serine/threonine kinase	ENSGALG00000025923	0.88	0.031
		IRX4	iroquois homeobox 4	ENSGALG00000022896	1.06	0.031
		S100A10	S100 calcium binding protein A10 (S100A10)	ENSGALG00000028774	1.02	0.031
		DNMT3A	DNA (cytosine-5)-methyltransferase 3A	ENSGALG00000003993	0.52	0.031
		ENSGALG00000006899	Uncharacterized protein	ENSGALG00000006899	0.9	0.032
		ENSGALG00000006768	Uncharacterized protein	ENSGALG00000006768	1.76	0.032
		SP2	Sp2 transcription factor	ENSGALG00000000233	0.72	0.032
		PAOX	polyamine oxidase (exo-N4-amino)	ENSGALG00000003557	1.02	0.032
		HIC1	hypermethylated in cancer 1 (HIC1)	ENSGALG00000026718	1.89	0.032
		HHEX	hematopoietically expressed homeobox (HHEX)	ENSGALG00000029169	1.11	0.033
		ENSGALG00000012495	Uncharacterized protein	ENSGALG00000012495	1.56	0.034
		NCKAP1L	NCK-associated protein 1-like (NCKAP1L)	ENSGALG00000027417	1.23	0.034
		SERPING1	serpin peptidase inhibitor, clade G (C1 inhibitor), member 1	ENSGALG00000007381	1.11	0.034
		ENSGALG00000027703	Uncharacterized protein	ENSGALG00000027703	0.91	0.034
		ABHD12B	abhydrolase domain containing 12B	ENSGALG00000020342	0.96	0.034
		CDON	cell adhesion associated, oncogene regulated	ENSGALG00000000939	0.67	0.034
		PSCA	prostate stem cell antigen	ENSGALG00000016153	-1.17	0.034
		ECHS1	enoyl CoA hydratase, short chain, 1, mitochondrial (ECHS1), nuclear gene encoding mitochondrial protein	ENSGALG00000024271	0.61	0.034
		ST6GALNAC6	ST6 (alpha-N-acetyl-neuraminyl-2,3-beta-galactosyl-1,3)-N-acetylgalactosaminide alpha-2,6-sialyltransferase 6	ENSGALG00000005298	1.1	0.034
		MYL1	Myosin light chain 1, skeletal muscle isoform	ENSGALG00000002907	3.98	0.034
		SIX2	SIX homeobox 2 (SIX2)	ENSGALG00000023303	1.44	0.034
		MPRIP	myosin phosphatase Rho interacting protein	ENSGALG00000004798	0.31	0.036
		SMARCA4	SWI/SNF related, matrix associated, actin dependent regulator of chromatin, subfamily a, member 4	ENSGALG00000026992	0.86	0.036
		ENSGALG00000026502	Uncharacterized protein	ENSGALG00000026502	-0.77	0.036
		FAM109B	family with sequence similarity 109, member B	ENSGALG00000011898	1.33	0.036
		COL16A1	collagen, type XVI, alpha 1	ENSGALG00000026836	1.73	0.037
		RGS14	regulator of G-protein signaling 14	ENSGALG00000003113	0.66	0.037
		ENSGALG00000023241	Uncharacterized protein	ENSGALG00000023241	1.23	0.037
		GPR124	G protein-coupled receptor 124	ENSGALG00000003118	0.69	0.037
		GMPPB	GDP-mannose pyrophosphorylase B	ENSGALG00000002500	1.28	0.037
		C3D	complement C3 precursor	ENSGALG00000011509	1.74	0.038
		ENSGALG00000026929	Uncharacterized protein	ENSGALG00000026929	0.73	0.038
		ENSGALG00000027884	Uncharacterized protein	ENSGALG00000027884	-0.38	0.038
		ALX-4	ALX homeobox 4 (ALX4)	ENSGALG00000025875	0.85	0.038
		CDHR3	cadherin-related family member 3	ENSGALG00000008109	1	0.039
		ARNT	aryl hydrocarbon receptor nuclear translocator (ARNT)	ENSGALG00000000751	0.42	0.039
		SLC4A2	solute carrier family 4, anion exchanger, member 2 (erythrocyte membrane protein band 3-like 1) (SLC4A2)	ENSGALG00000028756	1.21	0.039
		ANKMY1	ankyrin repeat and MYND domain containing 1	ENSGALG00000024040	-0.53	0.04
		LIMK1	LIM domain kinase 1 (LIMK1)	ENSGALG00000001076	0.93	0.04
		ACOT7	acyl-CoA thioesterase 7	ENSGALG00000000652	0.57	0.04
		TIMM13	translocase of inner mitochondrial membrane 13 homolog (yeast)	ENSGALG00000028937	1.7	0.04
		DBNL	drebrin-like	ENSGALG00000022337	0.76	0.04
		CTSL2	cathepsin L2 (CTSL2)	ENSGALG00000012610	-0.31	0.041
		LZTS2	leucine zipper, putative tumor suppressor 2	ENSGALG00000023612	1.13	0.041
		FAM110D	family with sequence similarity 110, member D	ENSGALG00000001453	1.26	0.041
		SPARC	secreted protein, acidic, cysteine-rich (osteonectin) (SPARC)	ENSGALG00000004184	0.45	0.041
		WSB2	WD repeat and SOCS box containing 2	ENSGALG00000008151	0.49	0.041
		ENSGALG00000023179	Uncharacterized protein	ENSGALG00000023179	-0.66	0.041
		EPHB3	EPH receptor B3	ENSGALG00000008537	0.69	0.041
		GOS2	G0/G1switch 2 (G0S2)	ENSGALG00000023933	0.71	0.042
		AK1	adenylate kinase 1 (AK1)	ENSGALG00000029150	1.02	0.042
		FAM131A	family with sequence similarity 131, member A	ENSGALG00000023776	1.56	0.042
		CDK5RAP3	CDK5 regulatory subunit associated protein 3 (CDK5RAP3)	ENSGALG00000025787	1.01	0.042
		NR2F6	nuclear receptor subfamily 2, group F, member 6	ENSGALG00000027294	1.67	0.042
		JUN	jun proto-oncogene (JUN)	ENSGALG00000010870	0.58	0.042
		PIEZO1	piezo-type mechanosensitive ion channel component 1	ENSGALG00000006340	0.88	0.042
		C12ORF57	chromosome 1 open reading frame, human C12orf57 (C12ORF57)	ENSGALG00000014555	1.67	0.042
		TMCC2	transmembrane and coiled-coil domain family 2	ENSGALG00000000673	0.37	0.043
		SOGA1	suppressor of glucose, autophagy associated 1	ENSGALG00000003409	0.43	0.043
		ENSGALG00000029066	Uncharacterized protein	ENSGALG00000029066	0.81	0.043
		ABCF3	ATP-binding cassette, sub-family F (GCN20), member 3	ENSGALG00000008480	0.47	0.043
		NEDD4L	neural precursor cell expressed, developmentally down-regulated 4-like, E3 ubiquitin protein ligase	ENSGALG00000002917	-0.27	0.044
		ATP6V1H	ATPase, H+ transporting, lysosomal 50/57kDa, V1 subunit H (ATP6V1H)	ENSGALG00000013621	-0.34	0.044
		ANLN	anillin, actin binding protein	ENSGALG00000012104	0.61	0.044
		TNNC1	troponin C type 1 (slow) (TNNC1)	ENSGALG00000001459	1.96	0.044
		PATL1	protein associated with topoisomerase II homolog 1 (yeast)	ENSGALG00000026800	0.87	0.044
		FLAD1	flavin adenine dinucleotide synthetase 1	ENSGALG00000027700	1	0.044
		GAD2	glutamate decarboxylase 2 (pancreatic islets and brain, 65kDa)	ENSGALG00000007588	-0.31	0.045
		WDR90	WD repeat domain 90	ENSGALG00000002535	1.01	0.045
		ENSGALG00000028303	Uridine-cytidine kinase	ENSGALG00000028303	0.85	0.045
		H3-IX	Histone H33	ENSGALG00000025711	1.28	0.045
		ETV3	ets variant 3	ENSGALG00000000669	0.66	0.045
		APBB1	amyloid beta (A4) precursor protein-binding, family B, member 1 (Fe65)	ENSGALG00000029159	1.37	0.045
		STK16	serine/threonine kinase 16	ENSGALG00000011326	1.44	0.045
		SLC13A5	solute carrier family 13 (sodium-dependent citrate transporter), member 5	ENSGALG00000005995	-0.33	0.045
		HSPB8	heat shock 22kDa protein 8	ENSGALG00000007383	0.7	0.045
		UBAP1L	ubiquitin associated protein 1-like	ENSGALG00000007333	0.83	0.046
		CNNM4	cyclin M4	ENSGALG00000028678	0.53	0.046
		CHRD	chordin (CHRD)	ENSGALG00000026983	1.62	0.046
		PBEF1	nicotinamide phosphoribosyltransferase (NAMPT)	ENSGALG00000008098	-0.31	0.046
		DCTN6	dynactin 6 (DCTN6)	ENSGALG00000010298	0.46	0.046
		ALDH4A1	aldehyde dehydrogenase 4 family, member A1 (ALDH4A1), nuclear gene encoding mitochondrial protein	ENSGALG00000003804	0.58	0.046
		TNFRSF25	tumor necrosis factor receptor superfamily, member 25	ENSGALG00000026499	1.16	0.046
		ARID3A	AT rich interactive domain 3A (BRIGHT-like)	ENSGALG00000026231	1.1	0.046
		FTD	ferritin, light polypeptide (FTL)	ENSGALG00000028696	-0.53	0.046
		FAM19A3	family with sequence similarity 19 (chemokine (C-C motif)-like), member A3	ENSGALG00000026585	0.55	0.046
		RETSAT	retinol saturase (all-trans-retinol 13,14-reductase)	ENSGALG00000014433	0.74	0.046
		SCARF1	scavenger receptor class F, member 1	ENSGALG00000002829	1.12	0.046
		CPLX2	complexin 2	ENSGALG00000027920	1.22	0.047
		ALPL	alkaline phosphatase, liver/bone/kidney	ENSGALG00000023542	1.21	0.047
		ENSGALG00000026939	Uncharacterized protein	ENSGALG00000026939	0.82	0.047
		SMPD1	sphingomyelin phosphodiesterase 1, acid lysosomal	ENSGALG00000026910	1.17	0.047
		BCOR	BCL6 corepressor	ENSGALG00000016245	0.34	0.047
		DUSP8	dual specificity phosphatase 8	ENSGALG00000006647	0.51	0.047
		CELSR3	cadherin, EGF LAG seven-pass G-type receptor 3	ENSGALG00000005730	0.34	0.047
		CBX4	chromobox homolog 4 (CBX4)	ENSGALG00000007063	0.83	0.048
		MTCH2	mitochondrial carrier 2 (MTCH2), nuclear gene encoding mitochondrial protein	ENSGALG00000005163	0.66	0.048
		RUNDC3A	RUN domain containing 3A	ENSGALG00000026518	1.05	0.048
		PAM16	presequence translocase-associated motor 16 homolog (S cerevisiae) (PAM16), nuclear gene encoding mitochondrial protein	ENSGALG00000025981	0.76	0.048
		TRIM62	tripartite motif containing 62	ENSGALG00000028437	1.09	0.048
		C1QA	complement component 1, q subcomponent, A chain	ENSGALG00000021569	1.2	0.048
		MCRS1	microspherule protein 1	ENSGALG00000000495	0.55	0.048
		KCNK3	TASK-1 potassium channel; Uncharacterized protein	ENSGALG00000025971	0.81	0.048
		PDLIM7	PDZ and LIM domain 7 (enigma) (PDLIM7)	ENSGALG00000026159	0.81	0.048
		TAZ	tafazzin	ENSGALG00000027098	1.07	0.048
		H2AFV	H2A histone family, member V	ENSGALG00000026713	1.55	0.048
		PRUNE2	prune homolog 2 (Drosophila)	ENSGALG00000015167	-0.3	0.048
		ENSGALG00000014852	Uncharacterized protein	ENSGALG00000014852	0.48	0.048
		TFEB	transcription factor EB (TFEB)	ENSGALG00000003404	0.71	0.048
		ENSGALG00000027836	Uncharacterized protein	ENSGALG00000027836	1.1	0.048
		ST6GALNAC4	ST6 (alpha-N-acetyl-neuraminyl-2,3-beta-galactosyl-1, 3)-N-acetylgalactosaminide alpha-2,6-sialyltransferase 4 (ST6GALNAC4)	ENSGALG00000005063	1.28	0.048
		ENSGALG00000003030	Uncharacterized protein	ENSGALG00000003030	0.75	0.048
		COL15A1	collagen, type XV, alpha 1	ENSGALG00000012616	1.42	0.049
		OLFML2A	olfactomedin-like 2A	ENSGALG00000001048	0.64	0.049
		CRIP2	cysteine-rich protein 2	ENSGALG00000026471	1.03	0.049
		SCRT2	scratch homolog 2, zinc finger protein (Drosophila) (SCRT2)	ENSGALG00000028912	1.18	0.049
		PSMD3	proteasome (prosome, macropain) 26S subunit, non-ATPase, 3 (PSMD3)	ENSGALG00000022293	0.35	0.049
		TMEM100	transmembrane protein 100	ENSGALG00000026465	0.79	0.05

## Sheet: TableS3_EdgeRDEGTime
Supplementary Table S3. Genes differentially-expressed over time during normal development and refractive error induction (EdgeR analysis)
To identify differentially-expressed genes within lens-groups over time, counts files across time-points were loaded into degust (Victorian Bioinformatics Consortium; www.github.com/Victorian-Bioinformatics-Consortium/degust) separately for each lens-condition. Differentially-expressed genes for each lens condition (normal development, myopia, or hyperopia induction) over time (1day relative to 2…
Lens condition	Time-point	Gene Symbol	Gene Name	Ensemble ID	Log2 Fold change	FDR adjusted p-value
No Lens	1 day to 2 days	SLC38A4	Gallus gallus solute carrier family 38, member 4 (SLC38A4), mRNA.	ENSGALG00000009730	1.52	0.036
No Lens	2 days to 3 days	NFIL3	Gallus gallus nuclear factor, interleukin 3 regulated (NFIL3), mRNA.	ENSGALG00000015209	0.84	0
		GUCA1A	Gallus gallus guanylate cyclase activator 1A (retina) (GUCA1A), mRNA.	ENSGALG00000001431	-1.06	0
		BLIMP-1	Uncharacterized protein	ENSGALG00000015388	1.05	0
		NPAS2	Gallus gallus neuronal PAS domain protein 2 (NPAS2), mRNA.	ENSGALG00000016774	0.89	0
		LAMP3	Gallus gallus lysosomal-associated membrane protein 3 (LAMP3), mRNA.	ENSGALG00000008759	1.36	0
		ENSGALG00000025733	Uncharacterized protein	ENSGALG00000025733	-1.34	0
		CNGA3	Gallus gallus cyclic nucleotide gated channel alpha 3 (CNGA3), mRNA.	ENSGALG00000016749	-0.89	0
		LBH	Gallus gallus limb bud and heart development homolog (mouse) (LBH), mRNA.	ENSGALG00000009052	0.65	0
		CACNA2D4	calcium channel, voltage-dependent, alpha 2/delta subunit 4	ENSGALG00000013007	0.73	0
		PER3	period circadian clock 3	ENSGALG00000000573	-0.9	0
		ARR3	Gallus gallus arrestin 3, retinal (ARR3), mRNA.	ENSGALG00000004251	-0.84	0
		ARNTL	Gallus gallus aryl hydrocarbon receptor nuclear translocator-like (ARNTL), mRNA.	ENSGALG00000005378	0.65	0
		MCF2L2	MCF.2 cell line derived transforming sequence-like 2	ENSGALG00000008744	0.66	0
		ARNTL2	Gallus gallus aryl hydrocarbon receptor nuclear translocator-like 2 (ARNTL2), mRNA.	ENSGALG00000014096	0.55	0
		SFRP4	secreted frizzled-related protein 4	ENSGALG00000012073	1.92	0
		LOC396454	Gallus gallus purpurin (LOC396454), mRNA.	ENSGALG00000015374	-1.52	0.001
		ENSGALG00000000722	Uncharacterized protein	ENSGALG00000000722	-1.23	0.001
		NET1	Gallus gallus neuroepithelial cell transforming 1 (NET1), mRNA.	ENSGALG00000008437	0.68	0.001
		TPH1	Gallus gallus tryptophan hydroxylase 1 (TPH1), mRNA.	ENSGALG00000006236	1.89	0.001
		GRK7	G protein-coupled receptor kinase 7	ENSGALG00000002800	-0.81	0.001
		ENSGALG00000002431	Uncharacterized protein	ENSGALG00000002431	0.7	0.002
		NUP210	nucleoporin 210kDa	ENSGALG00000005078	0.86	0.002
		RGS9	regulator of G-protein signaling 9	ENSGALG00000004060	-0.47	0.003
		PPEF2	protein phosphatase, EF-hand calcium binding domain 2	ENSGALG00000011524	0.57	0.005
		NIM1	Gallus gallus serine/threonine-protein kinase NIM1 (NIM1), mRNA.	ENSGALG00000014861	-0.7	0.005
		SLC24A1	Gallus gallus solute carrier family 24 (sodium/potassium/calcium exchanger), member 1 (SLC24A1), mRNA.	ENSGALG00000007495	0.68	0.006
		C2orf44	chromosome 2 open reading frame 44	ENSGALG00000019867	0.5	0.013
		GADL1	glutamate decarboxylase-like 1	ENSGALG00000011447	-0.49	0.014
		ENSGALG00000023601	Uncharacterized protein	ENSGALG00000023601	-0.56	0.014
		INPP5B	inositol polyphosphate-5-phosphatase, 75kDa	ENSGALG00000001606	0.58	0.015
		CPLX4	complexin 4	ENSGALG00000002817	-0.84	0.017
		ENSGALG00000018372	Novel Mt tRNA	ENSGALG00000018372	-3.18	0.017
		GLB1	Beta-galactosidase	ENSGALG00000001604	-0.52	0.02
		PPP2R2B	protein phosphatase 2, regulatory subunit B, beta	ENSGALG00000007565	-0.4	0.02
		SLC24A4	solute carrier family 24 (sodium/potassium/calcium exchanger), member 4	ENSGALG00000010793	-0.74	0.021
		CLUL1	clusterin-like 1 (retinal)	ENSGALG00000014904	0.46	0.023
		GLMN	glomulin, FKBP associated protein	ENSGALG00000005959	0.51	0.028
		ESRRB	estrogen-related receptor beta	ENSGALG00000010365	0.57	0.028
		RS1	Gallus gallus retinoschisin 1 (RS1), mRNA.	ENSGALG00000016523	-0.69	0.028
		PDE6B	Phosphodiesterase 6b subunit; Uncharacterized protein	ENSGALG00000015373	-0.81	0.039
		ENSGALG00000004630	Uncharacterized protein	ENSGALG00000004630	-0.49	0.048
		FBXL21	Gallus gallus F-box and leucine-rich repeat protein 21 (FBXL21), transcript variant 2, mRNA.	ENSGALG00000006327	0.4	0.049
Negative Lens	1 day to 2 days	ZNFX1	zinc finger, NFX1-type containing 1	ENSGALG00000004859	-1.28	0.016
		ENSGALG00000013057	Ubiquitin carboxyl-terminal hydrolase	ENSGALG00000013057	-1.68	0.016
		ARRDC3	arrestin domain containing 3	ENSGALG00000025915	-0.74	0.047
Negative Lens	2 days to 3 days	TNC	Gallus gallus tenascin C (TNC), mRNA	ENSGALG00000007113	1.05	0.001
		ABCB1LB	Gallus gallus ATP-binding cassette, sub-family B (MDR/TAP), member 1-like B (ABCB1LB), mRNA.	ENSGALG00000008912	1.07	0.001
		SPARCL1	SPARC-like 1 (hevin)	ENSGALG00000010929	0.8	0.001
		HSPA5	Gallus gallus heat shock 70kDa protein 5 (glucose-regulated protein, 78kDa) (HSPA5), mRNA.	ENSGALG00000001000	0.67	0.002
		ITPR3	inositol 1,4,5-trisphosphate receptor, type 3	ENSGALG00000003149	0.97	0.015
		CCBE1	collagen and calcium binding EGF domains 1	ENSGALG00000027785	0.7	0.042
		HSP70	Gallus gallus heat shock 70kDa protein 2 (HSPA2), mRNA.	ENSGALG00000011715	0.5	0.048
Positive Lens	1 day to 2 days	No significant results
Positive Lens	2 days to 3 days	ACTA1	Gallus gallus actin, alpha 1, skeletal muscle (ACTA1), mRNA.	ENSGALG00000011086	6.23	0
		ACTC1	Gallus gallus actin, alpha, cardiac muscle 1 (ACTC1), mRNA.	ENSGALG00000009844	3.98	0
		TNNT3	Gallus gallus troponin T type 3 (skeletal, fast) (TNNT3), mRNA.	ENSGALG00000006572	5.92	0
		CASQ2	Gallus gallus calsequestrin 2 (cardiac muscle) (CASQ2), nuclear gene encoding mitochondrial protein, mRNA.	ENSGALG00000015018	3.12	0.001
		MYH15	Gallus gallus myosin, heavy chain 15 (MYH15), mRNA.	ENSGALG00000015358	4.62	0.001
		MYBPC3	myosin binding protein C, cardiac	ENSGALG00000008148	4.43	0.002
		CACNA1S	calcium channel, voltage-dependent, L type, alpha 1S subunit	ENSGALG00000000730	3.18	0.002
		mir-7474	gga-mir-7474	ENSGALG00000026366	6.38	0.003
		MYBPC1	myosin binding protein C, slow type	ENSGALG00000012783	3.11	0.004
		CPLX4	complexin 4	ENSGALG00000002817	-0.8	0.012
		PDLIM3	Gallus gallus PDZ and LIM domain 3 (PDLIM3), mRNA	ENSGALG00000013414	2.04	0.012
		TNNC1	Gallus gallus troponin C type 1 (slow) (TNNC1), mRNA.	ENSGALG00000001459	2.91	0.013
		IMPG2	Gallus gallus interphotoreceptor matrix proteoglycan 2 (IMPG2), mRNA.	ENSGALG00000015322	-0.62	0.022
		MYL1	Myosin light chain 1, skeletal muscle isoform	ENSGALG00000002907	7.71	0.024
		PITX2	Gallus gallus paired-like homeodomain 2 (PITX2), mRNA.	ENSGALG00000026881	1.3	0.04
		OSF-2	Gallus gallus periostin, osteoblast specific factor (POSTN), mRNA.	ENSGALG00000017046	1.77	0.04
		ABI3BP	ABI family, member 3 (NESH) binding protein	ENSGALG00000015307	1.18	0.046

## Sheet: TableS4_DEGLensEnrichmts
Supplementary Table S4. Gene Ontology enrichments for the genes differentially-expressed following 1, 2, and 3 days of negative or positive lens-wear
Genes differentially-expressed (BH adjusted p-value<0.05) following 1, 2, and 3 days of Negative or Positive lens-wear (relative to age-matched no lens controls) were collapsed into a single list. This list was tested for enrichment (over-representation) of GO level 3-5 terms relative to the background list of all genes measured (hypergeometric test, q-value< 0.05, minimum 3 genes).
Condition	GO term name	Go ID	p-value	FDR q-value	List of Genes in Set
Negative Lens vs. No Lens controls	photoreceptor cell development	GO:0042461	0.000111524	0.0111266	GNAT1; PDE6C; CNGA3
	regulation of cartilage development	GO:0061035	0.000341933	0.0111266	CTGF; BMP2; WNT9A
	eye morphogenesis	GO:0048592	0.000372915	0.0111266	GNAT1; PDE6C; CNGA3; WNT9A
	regulation of Wnt signaling pathway	GO:0030111	0.000446548	0.0111266	ARNTL; PTPRO; WNT9A; BMP2; SFRP4
	sensory perception	GO:0007600	0.00055082	0.0111266	RGS16; PDE6C; CNGA3; GNAT1; GUCA1A; CACNA2D4
	neurogenesis	GO:0022008	0.00109392	0.0152461	ARNTL; WNT9A; BMP2; KALRN; PDE6C; CNGA3; PTPRO; TNC; GNAT1; MXRA8
	negative regulation of signal transduction	GO:0009968	0.00121855	0.0152461	ARNTL; RGS16; BMP2; SFRP4; HSPH1; WNT9A; PTPRO; IL1RL1
	chondrocyte differentiation	GO:0002062	0.00130467	0.0152461	CTGF; BMP2; WNT9A
	phototransduction	GO:0007602	0.00135856	0.0152461	GNAT1; PDE6C; GUCA1A
	detection of light stimulus	GO:0009583	0.000113521	0.015893	GNAT1; PDE6C; GUCA1A; CACNA2D4
	negative regulation of cell communication	GO:0010648	0.00250149	0.025265	ARNTL; RGS16; BMP2; SFRP4; HSPH1; WNT9A; PTPRO; IL1RL1
	regulation of signal transduction	GO:0009966	0.000768382	0.0327457	ARNTL; RGS16; BMP2; SFRP4; KALRN; PTPRO; CTGF; HSPH1; WNT9A; GNAT1; GUCA1A; NET1; IL1RL1
	regulation of response to external stimulus	GO:0032101	0.000895531	0.0327457	IL1RL1; SFRP4; PTPRO; PDK4; GNAT1; LBH; GUCA1A
	detection of external stimulus	GO:0009581	0.000563729	0.0335026	GNAT1; PDE6C; GUCA1A; CACNA2D4
	detection of abiotic stimulus	GO:0009582	0.000598261	0.0335026	GNAT1; PDE6C; GUCA1A; CACNA2D4
	regulation of G-protein coupled receptor protein signaling pathway	GO:0008277	0.00409484	0.0356214	GNAT1; RGS16; GUCA1A
	camera-type eye development	GO:0043010	0.00437119	0.0356214	GNAT1; PDE6C; CNGA3; WNT9A
	regulation of programmed cell death	GO:0043067	0.00521453	0.0356214	BMP2; SFRP4; KALRN; CTGF; PDK4; WNT9A; NET1; HSPH1
	positive regulation of cell differentiation	GO:0045597	0.00529031	0.0356214	ARNTL; BMP2; SFRP4; CTGF; WNT9A; NET1
	regulation of cell-substrate adhesion	GO:0010810	0.0060621	0.0367247	PTPRO; CCDC80; NET1
	positive regulation of cell death	GO:0010942	0.00632503	0.0367247	KALRN; CTGF; BMP2; SFRP4; NET1
	neuron differentiation	GO:0030182	0.00654499	0.0367247	WNT9A; BMP2; KALRN; PDE6C; CNGA3; PTPRO; TNC; GNAT1
	response to hydrogen peroxide	GO:0042542	0.00152861	0.042801	NET1; MT-ND6; HSPH1
	regulation of response to stimulus	GO:0048583	0.00153757	0.0498894	ARNTL; RGS16; BMP2; SFRP4; KALRN; PTPRO; CTGF; HSPH1; PDK4; WNT9A; GNAT1; LBH; GUCA1A; NET1; IL1RL1
	tissue development	GO:0009888	0.00217902	0.0498894	ARNTL; BMP2; SFRP4; WNT9A; PDE6C; CTGF; CNGA3; PTPRO; TNC; GNAT1
	organ morphogenesis	GO:0009887	0.00261581	0.0498894	BMP2; WNT9A; PDE6C; CTGF; CNGA3; TNC; GNAT1
	regulation of signaling	GO:0023051	0.00278099	0.0498894	ARNTL; RGS16; BMP2; SFRP4; KALRN; PTPRO; CTGF; HSPH1; WNT9A; GNAT1; GUCA1A; NET1; IL1RL1
	response to radiation	GO:0009314	0.00311809	0.0498894	GNAT1; PDE6C; GUCA1A; CACNA2D4; NET1
	photoreceptor outer segment	GO:0001750	0.000723663	0.00904579	GNAT1; CNGA3; GUCA1A
	nonmotile primary cilium	GO:0031513	0.00357415	0.0321673	GNAT1; CNGA3; GUCA1A
Positive Lens vs. No Lens controls	negative regulation of nitrogen compound metabolic process	GO:0051172	0.000121152	0.00293864	ARNTL; NPR3; BMP2; SFRP4; SHQ1; NFIL3
	negative regulation of cellular metabolic process	GO:0031324	0.000160289	0.00293864	ARNTL; NPR3; BMP2; SFRP4; PTX3; SHQ1; NFIL3
	regulation of Wnt signaling pathway	GO:0030111	0.00124741	0.0122186	ARNTL; BMP2; SFRP4
	negative regulation of biosynthetic process	GO:0009890	0.00133369	0.0122186	ARNTL; NPR3; BMP2; SFRP4; NFIL3
	negative regulation of macromolecule metabolic process	GO:0010605	0.00153712	0.0122186	ARNTL; BMP2; SFRP4; PTX3; SHQ1; NFIL3
	positive regulation of cell differentiation	GO:0045597	0.00173291	0.0122186	ARNTL; HAS2; BMP2; SFRP4
	negative regulation of metabolic process	GO:0009892	0.000350006	0.0154003	ARNTL; NPR3; BMP2; SFRP4; PTX3; SHQ1; NFIL3
	regulation of nitrogen compound metabolic process	GO:0051171	0.000582379	0.0170831	ARNTL; NPR3; BMP2; SFRP4; PTX3; SHQ1; NFIL3; HAS2
	regulation of primary metabolic process	GO:0080090	0.000802687	0.0176591	ARNTL; NPR3; BMP2; SFRP4; PTX3; SHQ1; NFIL3; C7; HAS2
	epithelial cell differentiation	GO:0030855	0.00601233	0.025326	ARNTL; BMP2; SFRP4
	positive regulation of cellular component organization	GO:0051130	0.00683606	0.025326	HAS2; PTX3; BMP2; SFRP4
	positive regulation of cell death	GO:0010942	0.00690709	0.025326	SHQ1; BMP2; SFRP4
	negative regulation of cell proliferation	GO:0008285	0.00787859	0.0254895	NPR3; BMP2; SFRP4
	protein dimerization activity	GO:0046983	0.00503695	0.0302217	ARNTL; ABCG2; NPR3; BMP2
	inflammatory response	GO:0006954	0.00350387	0.0325984	PTX3; C7; BMP2
	positive regulation of metabolic process	GO:0009893	0.00355177	0.0325984	ARNTL; NPR3; BMP2; SFRP4; PTX3; NFIL3; HAS2
	regulation of biosynthetic process	GO:0009889	0.00370436	0.0325984	ARNTL; NPR3; BMP2; SFRP4; PTX3; NFIL3; HAS2
	skeletal system development	GO:0001501	0.0041877	0.0335016	NPR3; BMP2; HAS2
	positive regulation of developmental process	GO:0051094	0.00531968	0.03788	ARNTL; HAS2; BMP2; SFRP4
	regulation of macromolecule metabolic process	GO:0060255	0.00559592	0.03788	ARNTL; BMP2; SFRP4; PTX3; SHQ1; NFIL3; C7; HAS2
	positive regulation of biological process	GO:0048518	0.00127199	0.0407036	ARNTL; NPR3; BMP2; SFRP4; PTX3; SHQ1; NFIL3; C7; HAS2
	regulation of nucleobase-containing compound metabolic process	GO:0019219	0.0137118	0.0418972	ARNTL; NPR3; BMP2; SFRP4; SHQ1; NFIL3
	regulation of cell development	GO:0060284	0.0160517	0.0453408	ARNTL; BMP2; HAS2
	regulation of cellular biosynthetic process	GO:0031326	0.0183662	0.0453408	ARNTL; NPR3; BMP2; SFRP4; PTX3; NFIL3
	regulation of gene expression	GO:0010468	0.0189607	0.0453408	ARNTL; BMP2; SFRP4; SHQ1; NFIL3; C7
	negative regulation of cellular process	GO:0048523	0.00776899	0.0488337	ARNTL; NPR3; BMP2; SFRP4; PTX3; SHQ1; NFIL3

## Sheet: TableS5_DEGTimeEnrichmts
Supplementary Table S5. Gene Ontology enrichments for the genes differentially-expressed over time during normal development and myopia induction
Genes differentially-expressed (BH adjusted p-value<0.05) over time during normal development or myopia induction (listed in Supplementary Table S4) were collapsed into a single list. Each list was was tested for enrichment (over-representation) of GO level 3-5 terms relative to the background list of all genes measured (hypergeometric test, q-value< 0.05, minimum 3 genes).
Condition	GO term name	Go ID	p-value	FDR q-value	List of Genes in Set
No Lens	active transmembrane transporter activity	GO:0022804	0.0024581	0.0430168	ABCG1; SLC16A3; ATP6AP1L; SLC24A4; SLC24A1
	regulation of circadian rhythm	GO:0042752	0.00018479	0.00656846	ARNTL; PER3; ARNTL2; FBXL21
	circadian regulation of gene expression	GO:0032922	0.000763021	0.0161671	ARNTL; PER3; NPAS2
	Hsp90 protein binding	GO:0051879	6.27e-05	0.00200669	ARNTL; PPEF2; NPAS2
	heat shock protein binding	GO:0031072	0.00189452	0.0430168	ARNTL; PPEF2; NPAS2
	phototransduction	GO:0007602	0.000274541	0.00750411	SLC24A1; GUCA1A; RS1; RGS9
	photoreceptor outer segment	GO:0001750	5.16e-06	8.19e-05	PPEF2; GUCA1A; CNGA3; ARR3; RGS9
	photoreceptor inner segment	GO:0001917	6.3e-06	8.19e-05	PPEF2; GUCA1A; ARR3; RGS9
	nonmotile primary cilium	GO:0031513	7.74e-05	0.00131627	PPEF2; GUCA1A; CNGA3; ARR3; RGS9
	primary cilium	GO:0072372	0.000539123	0.0046724	PPEF2; GUCA1A; CNGA3; ARR3; RGS9
	neurological system process	GO:0050877	6.07e-06	0.00085541	IMPG2; IMPG1; GRK7; SLC24A4; PPEF2; RGS9; CNGA3; ARR3; SLC24A1; GUCA1A; RS1; CACNA2D4
	sensory perception	GO:0007600	2.02e-08	1.66e-06	IMPG2; IMPG1; GRK7; SLC24A4; PPEF2; RGS9; CNGA3; ARR3; SLC24A1; GUCA1A; RS1; CACNA2D4
	system process	GO:0003008	0.00101955	0.0161671	IMPG2; IMPG1; GRK7; SLC24A4; PPEF2; RGS9; CNGA3; ARR3; SLC24A1; GUCA1A; RS1; CACNA2D4
	detection of light stimulus	GO:0009583	3.01e-05	0.00212262	SLC24A1; GUCA1A; RS1; CACNA2D4; RGS9
	cellular response to radiation	GO:0071478	7.38e-05	0.0034703	SLC24A1; GUCA1A; RS1; NET1; RGS9
	response to radiation	GO:0009314	8.65e-05	0.00656846	FBXL21; RGS9; SLC24A1; CACNA2D4; COL3A1; GUCA1A; RS1; NET1
	detection of external stimulus	GO:0009581	0.000219938	0.00656846	SLC24A1; GUCA1A; RS1; CACNA2D4; RGS9
	detection of abiotic stimulus	GO:0009582	0.000236701	0.00656846	SLC24A1; GUCA1A; RS1; CACNA2D4; RGS9
	cellular response to light stimulus	GO:0071482	0.00024626	0.00750411	SLC24A1; GUCA1A; RS1; RGS9
	cellular response to abiotic stimulus	GO:0071214	0.000965146	0.0161671	SLC24A1; GUCA1A; RS1; NET1; RGS9
	response to light stimulus	GO:0009416	0.000648011	0.0228424	SLC24A1; RS1; RGS9; GUCA1A; FBXL21; CACNA2D4
Negative Lens	response to wounding	GO:0009611	1.82e-05	0.00192919	KCNMB2; IL1RL1; HSPA5; MYH9; CTGF; TNC; ITPR3; C7
	regulation of defense response	GO:0031347	0.000177248	0.0120529	ERAP1; IL1RL1; ZC3HAV1; ITPR3; C7; PDK4
	cell-substrate adherens junction	GO:0005924	0.00318834	0.0302892	TES; MYH9; TNC; HSPA5
	adherens junction	GO:0005912	0.0058486	0.0364644	TES; MYH9; TNC; HSPA5
	regulation of response to stress	GO:0080134	0.000297521	0.0371901	ERAP1; IL1RL1; HSPA5; CTGF; PDK4; ITPR3; C7; ZC3HAV1
	focal adhesion	GO:0005925	0.0030794	0.0492703	TES; MYH9; TNC; HSPA5

## Sheet: TableS6_MethodsComp
Supplementary Table S6. Methodological comparison of Stone's microarray dataset with the current study
Method	Stone et al.	Current Study
Species	Chick (White Leghorn)	Chick (White Leghorn/New Hampshire)
Model	Optical defocus	Optical defocus
Lens power	±15D	±10D
Age at lensing	8 days	5 days
Lensing (hrs into day)	1 hour	6 hours
Time-points	6 hours, 3 days	1 day, 2 days, 3 days
Controls	Contralateral eye	Separate No Lens chicks
Tissue analysed	Retina/RPE	Retina/RPE/choroid
Expression measure	Affymetrix Chicken Genome Array	RNA sequencing

## Sheet: TableS7_DEGLens
Supplementary Table S7. Genes differentially-expressed during myopia and hyperopia induction relative to no lens controls
Differentially-expressed genes for each lens condition (myopia or hyperopia induction) relative to age-matched No Lens controls were identified using DESeq2 with a BH-adjusted p-value cut-off of 0.05.
Lens condition	Time-point	Gene Symbol	Gene Name	Ensemble ID	Fold change	Log2 Fold Change	BH-adjusted p-value
Negative	1 day	ZNFX1	zinc finger, NFX1-type containing 1 [Source:HGNC Symbol;Acc:29271]	ENSGALG00000004859	1.442	0.528	0.00666802
		PDK4	Gallus gallus pyruvate dehydrogenase kinase, isozyme 4 (PDK4), nuclear gene encoding mitochondrial protein, mRNA. [Source:RefSeq mRNA;Acc:NM_001199909]	ENSGALG00000009700	1.433	0.519	0.00680861
		IL1RL1	Gallus gallus interleukin 1 receptor-like 1 (IL1RL1), transcript variant 3, mRNA. [Source:RefSeq mRNA;Acc:NM_001024590]	ENSGALG00000016785	1.427	0.513	0.00680861
		NA	Uncharacterized protein [Source:UniProtKB/TrEMBL;Acc:F1P3J2]	ENSGALG00000006384	1.359	0.442	0.00959516
		PTPRO	Gallus gallus protein tyrosine phosphatase, receptor type, O (PTPRO), mRNA. [Source:RefSeq mRNA;Acc:NM_204122]	ENSGALG00000013085	1.345	0.428	0.0289231
		NET1	Gallus gallus neuroepithelial cell transforming 1 (NET1), mRNA. [Source:RefSeq mRNA;Acc:NM_001030648]	ENSGALG00000008437	1.341	0.424	0.0457928
		LAMP3	Gallus gallus lysosomal-associated membrane protein 3 (LAMP3), mRNA. [Source:RefSeq mRNA;Acc:NM_001146132]	ENSGALG00000008759	1.336	0.418	0.0457928
		NFIL3	Gallus gallus nuclear factor, interleukin 3 regulated (NFIL3), mRNA. [Source:RefSeq mRNA;Acc:NM_204618]	ENSGALG00000015209	1.327	0.408	0.0414533
		MXRA8	Gallus gallus matrix-remodelling associated 8 (MXRA8), mRNA. [Source:RefSeq mRNA;Acc:NM_204636]	ENSGALG00000001561	1.317	0.397	0.0473994
		KDM1B	lysine (K)-specific demethylase 1B [Source:HGNC Symbol;Acc:21577]	ENSGALG00000012685	1.302	0.38	0.0414533
		C20orf194	chromosome 20 open reading frame 194 [Source:HGNC Symbol;Acc:17721]	ENSGALG00000016026	1.292	0.37	0.0414533
		HSPH1	heat shock 105kDa [Source:RefSeq peptide;Acc:NP_001153170]	ENSGALG00000017077	1.255	0.328	0.0139163
		KALRN	kalirin, RhoGEF kinase [Source:HGNC Symbol;Acc:4814]	ENSGALG00000011744	1.228	0.296	0.0139163
		ADAMTSL3	ADAMTS-like 3 [Source:HGNC Symbol;Acc:14633]	ENSGALG00000006104	0.74	-0.434	0.0473994
		NA	Uncharacterized protein [Source:UniProtKB/TrEMBL;Acc:F1NVY4]	ENSGALG00000006565	0.737	-0.44	0.0473994
		GUCA1A	Gallus gallus guanylate cyclase activator 1A (retina) (GUCA1A), mRNA. [Source:RefSeq mRNA;Acc:NM_204320]	ENSGALG00000001431	0.735	-0.444	0.0414533
		RGS16	Gallus gallus regulator of G-protein signaling 16 (RGS16), mRNA. [Source:RefSeq mRNA;Acc:NM_001277544]	ENSGALG00000027550	0.698	-0.518	0.00666802
		NA	Uncharacterized protein [Source:UniProtKB/TrEMBL;Acc:R4GIF5]	ENSGALG00000025733	0.685	-0.546	0.00388677
		CCDC80	coiled-coil domain-containing protein 80 precursor [Source:RefSeq peptide;Acc:NP_989762]	ENSGALG00000015193	0.663	-0.592	1.80882e-05
		BMP2	Gallus gallus bone morphogenetic protein 2 (BMP2), mRNA. [Source:RefSeq mRNA;Acc:NM_204358]	ENSGALG00000008830	0.63	-0.667	2.37683e-05
Negative	2 days	OTUD1	OTU domain containing 1 [Source:HGNC Symbol;Acc:27346]""	ENSGALG00000026426	1.575	0.656	1.24177e-06
		NFIL3	Gallus gallus nuclear factor, interleukin 3 regulated (NFIL3), mRNA. [Source:RefSeq mRNA;Acc:NM_204618]	ENSGALG00000015209	1.507	0.591	4.21428e-06
		BLIMP-1	Uncharacterized protein [Source:UniProtKB/TrEMBL;Acc:F1NKI2]	ENSGALG00000015388	1.483	0.568	0.00229526
		ARNTL	Gallus gallus aryl hydrocarbon receptor nuclear translocator-like (ARNTL), mRNA. [Source:RefSeq mRNA;Acc:NM_001001463]	ENSGALG00000005378	1.396	0.481	1.24177e-06
		CACNA2D4	calcium channel, voltage-dependent, alpha 2/delta subunit 4 [Source:HGNC Symbol;Acc:20202]	ENSGALG00000013007	1.38	0.465	0.0167905
		ETNK1	ethanolamine kinase 1 [Source:HGNC Symbol;Acc:24649]	ENSGALG00000013205	1.381	0.465	0.036882
		C2orf44	chromosome 2 open reading frame 44 [Source:HGNC Symbol;Acc:26157]	ENSGALG00000019867	1.36	0.444	0.0104271
		LBH	Gallus gallus limb bud and heart development homolog (mouse) (LBH), mRNA. [Source:RefSeq mRNA;Acc:NM_001031038]	ENSGALG00000009052	1.345	0.428	0.0148688
		LONRF3	LON peptidase N-terminal domain and ring finger 3 [Source:HGNC Symbol;Acc:21152]	ENSGALG00000008860	1.326	0.407	0.0307718
		NA	Uncharacterized protein [Source:UniProtKB/TrEMBL;Acc:E1C0M0]	ENSGALG00000002638	1.317	0.398	0.000133062
		CITED3	Gallus gallus Cbp/p300-interacting transactivator, with Glu/Asp-rich carboxy-terminal domain, 4 (CITED4), mRNA. [Source:RefSeq mRNA;Acc:NM_204718]	ENSGALG00000000678	1.208	0.272	0.0111125
		PRPF38B	pre-mRNA processing factor 38B [Source:HGNC Symbol;Acc:25512]	ENSGALG00000001972	0.773	-0.371	0.0378608
		PDE6C	Gallus gallus phosphodiesterase 6C, cGMP-specific, cone, alpha prime (PDE6C), mRNA. [Source:RefSeq mRNA;Acc:NM_204986]	ENSGALG00000006626	0.769	-0.379	0.0104271
		ANGIOPOIETIN-2	angiopoietin-2 [Source:RefSeq peptide;Acc:NP_990148]	ENSGALG00000016330	0.762	-0.392	0.047447
		CTGF	Gallus gallus connective tissue growth factor (CTGF), mRNA. [Source:RefSeq mRNA;Acc:NM_204274]	ENSGALG00000002909	0.736	-0.442	0.043022
		CNGA3	Gallus gallus cyclic nucleotide gated channel alpha 3 (CNGA3), mRNA. [Source:RefSeq mRNA;Acc:NM_205221]	ENSGALG00000016749	0.721	-0.472	0.0480808
		TNC	Gallus gallus tenascin C (TNC), mRNA. [Source:RefSeq mRNA;Acc:NM_205456]	ENSGALG00000007113	0.717	-0.481	0.047447
		KCNH7	potassium voltage-gated channel, subfamily H (eag-related), member 7 [Source:HGNC Symbol;Acc:18863]	ENSGALG00000011082	0.7	-0.514	0.0167905
		MT-ND6	NADH-ubiquinone oxidoreductase chain 6 [Source:UniProtKB/Swiss-Prot;Acc:P18941]	ENSGALG00000018357	0.689	-0.537	0.0111125
Negative	3 days	WNT9A	Gallus gallus wingless-type MMTV integration site family, member 9A (WNT9A), mRNA. [Source:RefSeq mRNA;Acc:NM_204981]	ENSGALG00000005401	1.398	0.483	0.0366568
		GNAT1	Gallus gallus guanine nucleotide binding protein (G protein), alpha transducing activity polypeptide 1 (GNAT1), mRNA. [Source:RefSeq mRNA;Acc:NM_204691]	ENSGALG00000028697	1.362	0.446	0.0300842
		SFRP4	secreted frizzled-related protein 4 [Source:HGNC Symbol;Acc:10778]	ENSGALG00000012073	0.624	-0.68	0.00144308
Positive	1 day	C7	complement component 7 [Source:HGNC Symbol;Acc:1346]	ENSGALG00000014835	1.445	0.531	0.0321983
		BMP2	Gallus gallus bone morphogenetic protein 2 (BMP2), mRNA. [Source:RefSeq mRNA;Acc:NM_204358]	ENSGALG00000008830	1.432	0.518	0.0321983
		NPR3	natriuretic peptide receptor C/guanylate cyclase C (atrionatriuretic peptide receptor C) [Source:HGNC Symbol;Acc:7945]	ENSGALG00000017405	1.409	0.494	0.0396613
		HAS2	hyaluronan synthase 2 [Source:RefSeq peptide;Acc:NP_990137]	ENSGALG00000016394	1.406	0.492	0.0376559
		ABCG2	ATP-binding cassette, sub-family G (WHITE), member 2 [Source:HGNC Symbol;Acc:74]	ENSGALG00000005792	0.719	-0.477	0.0321983
Positive	2 days	HAS2	hyaluronan synthase 2 [Source:RefSeq peptide;Acc:NP_990137]	ENSGALG00000016394	1.613	0.689	0.000166127
		NFIL3	Gallus gallus nuclear factor, interleukin 3 regulated (NFIL3), mRNA. [Source:RefSeq mRNA;Acc:NM_204618]	ENSGALG00000015209	1.563	0.644	1.33935e-06
		PTX3	pentraxin-related protein PTX3 precursor [Source:RefSeq peptide;Acc:NP_001017413]	ENSGALG00000028284	1.539	0.622	1.49801e-05
		LAMP3	Gallus gallus lysosomal-associated membrane protein 3 (LAMP3), mRNA. [Source:RefSeq mRNA;Acc:NM_001146132]	ENSGALG00000008759	1.523	0.607	0.00425196
		BLIMP-1	Uncharacterized protein [Source:UniProtKB/TrEMBL;Acc:F1NKI2]	ENSGALG00000015388	1.477	0.562	0.007069
		C7	complement component 7 [Source:HGNC Symbol;Acc:1346]	ENSGALG00000014835	1.437	0.523	0.0217786
		NA	Uncharacterized protein [Source:UniProtKB/TrEMBL;Acc:E1BYA7]	ENSGALG00000001629	1.389	0.475	0.0296923
		ARNTL	Gallus gallus aryl hydrocarbon receptor nuclear translocator-like (ARNTL), mRNA. [Source:RefSeq mRNA;Acc:NM_001001463]	ENSGALG00000005378	1.38	0.464	1.15626e-05
		SHQ1	SHQ1, H/ACA ribonucleoprotein assembly factor [Source:HGNC Symbol;Acc:25543]	ENSGALG00000007798	1.365	0.448	0.0296923
Positive	3 days	NA	Uncharacterized protein [Source:UniProtKB/TrEMBL;Acc:E1C8T1]	ENSGALG00000014171	1.513	0.597	0.0223792
		SFRP4	secreted frizzled-related protein 4 [Source:HGNC Symbol;Acc:10778]	ENSGALG00000012073	0.535	-0.903	1.75842e-08

## Sheet: TableS8_PastRes
Supplementary Table S8. Comparison of single-gene findings with past exploratory animal studies of optically-induced myopia/hyperopia
Differentially-expressed genes the present study, and published exploratory GWAS, proteomics, and transcriptome studies of optically-induced refractive error were converted to a common identifier using the Biological DataBase Network (BioDB; http://biodbnet.abcc.ncifcrf.gov/). Lists of genes from each study were compared using a data intersection tool (John Dittmar-Rothstein Lab; rothsteinlab.com…
Present Study						Past Studies
Gene Symbol	Gene Name	Ensemble	Condition	Time	FC Direction	Type	Year	First Author	Species	Condition	Tissue	Time	FC Direction
BMP2	Bone morphogenetic protein 2	ENSGALG00000008830	Negative Lens v No Lens	1d	Down	GWAS	2013	Verhoeven	Human	Refractive error	NA	NA	NA
			Positive Lens v No Lens	1d	Up		2014	Cheng	Human	Axial length	NA	NA	NA
HSPA5	Heat shock 70kDa protein 5	ENSGALG00000001000	Negative Lens over time	2-3d	Up	Proteomics	2007	Frost	Tree shrew	LIMR	Sclera	4d	Up
BMP2	Bone morphogenetic protein 2	ENSGALG00000008830	Negative Lens v No Lens	1d	Down	Transcriptome	2011	Stone	Chick	LIM	Retina/RPE	6h, 3d	Down
			Positive Lens v No Lens	1d	Up		2007	McGlinn	Chick	LIM	Retina/RPE	6h, 3d	Down
							2014	He	Tree Shrew	LIM	Choroid	2d, 11d	Up
							2014	He	Tree Shrew	LIM, LIMR	Choroid	2d	Up
KCNH7	Potassium voltage-gated channel, subfamily H (eag-related), member 7	ENSGALG00000011082	Negative Lens v No Lens	2d	Down		2011	Stone	Chick	LIM	Retina/RPE	6h	Down
LBH	Limb bud and heart development homolog (mouse)	ENSGALG00000009052	No Lens over time	1-2d	Down		2007	McGlinn	Chick	FDM	Retina/RPE	6h, 3d	Up
			No Lens over time	2-3d	Up		2006	Tkatchenko	Primate	FDM	Retina	2.1-3.9m	Up
			Negative Lens v No Lens	2d	Up
NPAS2	Neuronal PAS domain protein 2	ENSGALG00000016774	No Lens over time	2-3d	Up		2011	Stone	Chick	LIM	Retina/RPE	6h, 3d	Down
PDK4	Pyruvate dehydrogenase kinase, isozyme 4	ENSGALG00000009700	Negative Lens v No Lens	1d	Up		2007	McGlinn	Chick	FDM	Retina/RPE	6h, 3d	Up
			Negative Lens over time	1-2d	Down
PER3	Period circadian clock 3	ENSGALG00000000573	No Lens over time	2-3d	Down		2011	Stone	Chick	LIM	Retina/RPE	6h	Down
SHQ1	SHQ1, H/ACA ribonucleoprotein assembly factor	ENSGALG00000007798	Positive Lens v No Lens	2d	Up		2008	Schippert	Chick	LIH	Retina	1d	Up
WNT9A	Wingless-type MMTV integration site family, member 9A	ENSGALG00000005401	Negative Lens v No Lens	3d	Up		2011	Stone	Chick	LIM	Retina/RPE	6h	Up
CTGF	Connective tissue growth factor (CTGF)	ENSGALG00000002909	Negative Lens v No Lens	2d	Down		2007	McGlinn	Chick	FDM	Retina/RPE	6h	Down
			Negative Lens over time	1-2d	Down
NDRG1	N-myc downstream regulated 1	ENSGALG00000016216	No Lens over time	2-3d	Up		2011	Stone	Chick	LIM	Retina/RPE	3d	Down
							2010	Ashby	Chick	LIM	ACL	1d	Up
PRPF38B	pre-mRNA processing factor 38B	ENSGALG00000001972	Negative Lens v No Lens	2d	Down		2011	Stone	Chick	LIM	Retina/RPE	3d	Down
KALRN			Negative Lens v No Lens	1d	Up		2011	Stone	Chick	LIM	Retina/RPE	6h	Down
IMPG2	Interphotoreceptor matrix proteoglycan 2 (IMPG2)	ENSGALG00000015322	No Lens over time	2-3d	Down		2011	Stone	Chick	LIM	Retina/RPE	6h	Down
ANGIOPOIETIN-2			Negative Lens v No Lens	2d	Down		2010	Ashby	Chick	LIM	ACL	1d	Up
LOC425783	C-type lectin domain family 2 member D-like (LOC425783)	ENSGALG00000009771	Negative Lens over time	1-2d	Down		2011	Stone	Chick	LIM	Retina/RPE	3d	Up
SPARCL1	SPARC-like 1 (hevin)	ENSGALG00000010929	Negative Lens over time	2-3d	Up		2011	Stone	Chick	LIM	Retina/RPE	6h	Down
MCF2L2	MCF.2 cell line derived transforming sequence-like 2	ENSGALG00000008744	No Lens over time	2-3d	Up		2011	Stone	Chick	LIM	Retina/RPE	6h	Down
ADAMTSL3	ADAMTS-like 3	ENSGALG00000006104	Negative Lens v No Lens	1d	Down		2014	He	Tree Shrew	LIM	Choroid	2d, 11d	Down
							2014	He	Tree Shrew	LIMR	Choroid	2d	Up
TNC	Tenascin C (TNC)	ENSGALG00000007113	Negative Lens v No Lens	2d	Down		2014	He	Tree Shrew	LIMR	Choroid	2d	Up
			Negative Lens over time	2-3d	Up
PTX3	Pentraxin-related protein PTX3 precursor	ENSGALG00000028284	Positive Lens v No Lens	2d	Up		2014	He	Tree Shrew	LIM	Choroid	2d, 11d	Down

## Sheet: TableS9_DEGTime
Supplementary Table S9. Genes differentially-expressed over time during normal development and refractive error induction
Differentially-expressed genes for each lens condition (normal development, myopia, or hyperopia induction) over time (1day relative to 2days, and 2days relative to 3days) were identified using DESeq2 with a BH-adjusted p-value cut-off of 0.05.
Lens condition	Time-point	Gene Symbol	Gene Name	Ensemble ID	Fold change	Log2 Fold Change	BH-adjusted p-value
No Lens	1 day to 2 days	EGLN1	egl-9 family hypoxia-inducible factor 1 [Source:HGNC Symbol;Acc:1232]	ENSGALG00000011056	1.226	0.293	0.0435311
		LBH	Gallus gallus limb bud and heart development homolog (mouse) (LBH), mRNA. [Source:RefSeq mRNA;Acc:NM_001031038]	ENSGALG00000009052	0.767	-0.382	0.0260257
		COL3A1	Gallus gallus collagen, type III, alpha 1 (COL3A1), mRNA. [Source:RefSeq mRNA;Acc:NM_205380]	ENSGALG00000002552	0.721	-0.473	0.0260257
No Lens	2 days to 3 days	BLIMP-1	Uncharacterized protein [Source:UniProtKB/TrEMBL;Acc:F1NKI2]	ENSGALG00000015388	1.67	0.74	2.55905e-07
		NFIL3	Gallus gallus nuclear factor, interleukin 3 regulated (NFIL3), mRNA. [Source:RefSeq mRNA;Acc:NM_204618]	ENSGALG00000015209	1.626	0.701	2.69608e-09
		NPAS2	Gallus gallus neuronal PAS domain protein 2 (NPAS2), mRNA. [Source:RefSeq mRNA;Acc:NM_001030542]	ENSGALG00000016774	1.612	0.689	2.55905e-07
		CACNA2D4	calcium channel, voltage-dependent, alpha 2/delta subunit 4 [Source:HGNC Symbol;Acc:20202]	ENSGALG00000013007	1.488	0.574	2.50116e-05
		LBH	Gallus gallus limb bud and heart development homolog (mouse) (LBH), mRNA. [Source:RefSeq mRNA;Acc:NM_001031038]	ENSGALG00000009052	1.474	0.559	2.55905e-07
		MCF2L2	MCF.2 cell line derived transforming sequence-like 2 [Source:HGNC Symbol;Acc:30319]	ENSGALG00000008744	1.454	0.54	5.24276e-05
		ARNTL	Gallus gallus aryl hydrocarbon receptor nuclear translocator-like (ARNTL), mRNA. [Source:RefSeq mRNA;Acc:NM_001001463]	ENSGALG00000005378	1.45	0.536	3.76545e-05
		NA	Uncharacterized protein [Source:UniProtKB/TrEMBL;Acc:E1C7P4]	ENSGALG00000002431	1.441	0.527	0.000957246
		NET1	Gallus gallus neuroepithelial cell transforming 1 (NET1), mRNA. [Source:RefSeq mRNA;Acc:NM_001030648]	ENSGALG00000008437	1.437	0.523	0.000523617
		SLC24A1	Gallus gallus solute carrier family 24 (sodium/potassium/calcium exchanger), member 1 (SLC24A1), mRNA. [Source:RefSeq mRNA;Acc:NM_001001773]	ENSGALG00000007495	1.393	0.479	0.00653631
		ARNTL2	Gallus gallus aryl hydrocarbon receptor nuclear translocator-like 2 (ARNTL2), mRNA. [Source:RefSeq mRNA;Acc:NM_204133]	ENSGALG00000014096	1.39	0.475	9.17227e-05
		PPEF2	protein phosphatase, EF-hand calcium binding domain 2 [Source:HGNC Symbol;Acc:9244]	ENSGALG00000011524	1.369	0.453	0.00319648
		INPP5B	inositol polyphosphate-5-phosphatase, 75kDa [Source:HGNC Symbol;Acc:6077]	ENSGALG00000001606	1.36	0.444	0.00835656
		CD82	Gallus gallus CD82 molecule (CD82), mRNA. [Source:RefSeq mRNA;Acc:NM_001008470]	ENSGALG00000008044	1.342	0.424	0.0314465
		ESRRB	estrogen-related receptor beta [Source:HGNC Symbol;Acc:3473]	ENSGALG00000010365	1.335	0.417	0.0228902
		C2orf44	chromosome 2 open reading frame 44 [Source:HGNC Symbol;Acc:26157]	ENSGALG00000019867	1.333	0.415	0.00454224
		GLMN	glomulin, FKBP associated protein [Source:HGNC Symbol;Acc:14373]	ENSGALG00000005959	1.331	0.413	0.0119592
		CLUL1	clusterin-like 1 (retinal) [Source:HGNC Symbol;Acc:2096]	ENSGALG00000014904	1.322	0.403	0.00111098
		ETNK1	ethanolamine kinase 1 [Source:HGNC Symbol;Acc:24649]	ENSGALG00000013205	1.317	0.398	0.0475696
		STXBP4	syntaxin binding protein 4 [Source:HGNC Symbol;Acc:19694]	ENSGALG00000003033	1.312	0.392	0.0314465
		LAPTM4B	lysosomal protein transmembrane 4 beta [Source:HGNC Symbol;Acc:13646]	ENSGALG00000028628	1.295	0.373	0.0275139
		ABCG1	ATP-binding cassette, sub-family G (WHITE), member 1 [Source:HGNC Symbol;Acc:73]	ENSGALG00000016164	1.294	0.371	0.0189277
		FAR2	fatty acyl CoA reductase 2 [Source:HGNC Symbol;Acc:25531]	ENSGALG00000017291	1.284	0.36	0.0189277
		LONRF3	LON peptidase N-terminal domain and ring finger 3 [Source:HGNC Symbol;Acc:21152]	ENSGALG00000008860	1.28	0.356	0.0111532
		FBXL21	Gallus gallus F-box and leucine-rich repeat protein 21 (FBXL21), transcript variant 2, mRNA. [Source:RefSeq mRNA;Acc:NM_001270995]	ENSGALG00000006327	1.277	0.353	0.0102729
		IQGAP2	Gallus gallus IQ motif containing GTPase activating protein 2 (IQGAP2), mRNA. [Source:RefSeq mRNA;Acc:NM_001277778]	ENSGALG00000014978	1.268	0.342	0.00548762
		ATP6AP1L	ATPase, H+ transporting, lysosomal accessory protein 1-like [Source:HGNC Symbol;Acc:28091]	ENSGALG00000015618	1.267	0.342	0.0364132
		RNF34	Gallus gallus ring finger protein 34, E3 ubiquitin protein ligase (RNF34), mRNA. [Source:RefSeq mRNA;Acc:NM_001006188]	ENSGALG00000004190	1.258	0.331	0.0475696
		C1orf198	chromosome 1 open reading frame 198 [Source:HGNC Symbol;Acc:25900]	ENSGALG00000026600	1.252	0.324	0.0387284
		ELOVL2	Gallus gallus ELOVL fatty acid elongase 2 (ELOVL2), mRNA. [Source:RefSeq mRNA;Acc:NM_001197308]	ENSGALG00000012748	1.25	0.322	0.0189277
		NDRG1	N-myc downstream regulated 1 [Source:HGNC Symbol;Acc:7679]	ENSGALG00000016216	1.249	0.321	0.0327906
		KDM1B	lysine (K)-specific demethylase 1B [Source:HGNC Symbol;Acc:21577]	ENSGALG00000012685	1.245	0.316	0.0111504
		FAM46A	uncharacterized protein LOC421845 [Source:RefSeq peptide;Acc:NP_001026256]	ENSGALG00000015865	1.242	0.313	0.0222253
		NA	Uncharacterized protein [Source:UniProtKB/TrEMBL;Acc:E1BT30]	ENSGALG00000009559	1.227	0.295	0.0247622
		PPA1	pyrophosphatase (inorganic) 1 [Source:HGNC Symbol;Acc:9226]	ENSGALG00000004442	0.802	-0.319	0.00319648
		SLC16A3	Gallus gallus solute carrier family 16, member 8 (monocarboxylic acid transporter 3) (SLC16A8), mRNA. [Source:RefSeq mRNA;Acc:NM_205140]	ENSGALG00000012288	0.795	-0.33	0.00853955
		PPP2R2B	protein phosphatase 2, regulatory subunit B, beta [Source:HGNC Symbol;Acc:9305]	ENSGALG00000007565	0.785	-0.349	0.00540878
		IMPG2	Gallus gallus interphotoreceptor matrix proteoglycan 2 (IMPG2), mRNA. [Source:RefSeq mRNA;Acc:NM_001044639]	ENSGALG00000015322	0.779	-0.359	0.0247622
		NA	Uncharacterized protein [Source:UniProtKB/TrEMBL;Acc:F1NUE5]	ENSGALG00000016499	0.769	-0.379	0.0496721
		NA	Uncharacterized protein [Source:UniProtKB/TrEMBL;Acc:F1NJK1]	ENSGALG00000004630	0.765	-0.387	0.0157061
		IMPG1	Gallus gallus interphotoreceptor matrix proteoglycan 1 (IMPG1), mRNA. [Source:RefSeq mRNA;Acc:NM_204241]	ENSGALG00000015897	0.76	-0.396	0.0208508
		GADL1	glutamate decarboxylase-like 1 [Source:HGNC Symbol;Acc:27949]	ENSGALG00000011447	0.757	-0.401	0.00548762
		NA	Beta-galactosidase [Source:UniProtKB/TrEMBL;Acc:F1NLL2]	ENSGALG00000001604	0.755	-0.406	0.0117903
		RGS9	regulator of G-protein signaling 9 [Source:HGNC Symbol;Acc:10004]	ENSGALG00000004060	0.753	-0.409	0.000563863
		NA	Uncharacterized protein [Source:UniProtKB/TrEMBL;Acc:E1BXM0]	ENSGALG00000023601	0.742	-0.431	0.00835656
		RS1	Gallus gallus retinoschisin 1 (RS1), mRNA. [Source:RefSeq mRNA;Acc:NM_001134975]	ENSGALG00000016523	0.74	-0.434	0.0364132
		SLC24A4	solute carrier family 24 (sodium/potassium/calcium exchanger), member 4 [Source:HGNC Symbol;Acc:10978]	ENSGALG00000010793	0.724	-0.466	0.0178232
		CPLX4	complexin 4 [Source:HGNC Symbol;Acc:24330]	ENSGALG00000002817	0.721	-0.471	0.0208508
		NIM1	Gallus gallus serine/threonine-protein kinase NIM1 (NIM1), mRNA. [Source:RefSeq mRNA;Acc:NM_001252130]	ENSGALG00000014861	0.717	-0.479	0.00813556
		NA	Uncharacterized protein [Source:UniProtKB/TrEMBL;Acc:R4GIF5]	ENSGALG00000025733	0.707	-0.501	0.00835656
		GRK7	G protein-coupled receptor kinase 7 [Source:HGNC Symbol;Acc:17031]	ENSGALG00000002800	0.694	-0.528	0.00319648
		PER3	period circadian clock 3 [Source:HGNC Symbol;Acc:8847]	ENSGALG00000000573	0.661	-0.598	0.00020866
		ARR3	Gallus gallus arrestin 3, retinal (ARR3), mRNA. [Source:RefSeq mRNA;Acc:NM_001097533]	ENSGALG00000004251	0.658	-0.604	7.35981e-05
		CNGA3	Gallus gallus cyclic nucleotide gated channel alpha 3 (CNGA3), mRNA. [Source:RefSeq mRNA;Acc:NM_205221]	ENSGALG00000016749	0.654	-0.614	7.70491e-05
		GUCA1A	Gallus gallus guanylate cyclase activator 1A (retina) (GUCA1A), mRNA. [Source:RefSeq mRNA;Acc:NM_204320]	ENSGALG00000001431	0.584	-0.775	1.4561e-08
Negative Lens	1 day to 2 days	HCFC2	host cell factor C2 [Source:HGNC Symbol;Acc:24972]	ENSGALG00000012718	1.241	0.312	0.0200449
		NA	Uncharacterized protein [Source:UniProtKB/TrEMBL;Acc:F1P5H7]	ENSGALG00000019141	0.792	-0.337	0.00834175
		NA	Uncharacterized protein [Source:UniProtKB/TrEMBL;Acc:F1NV98]	ENSGALG00000009479	0.788	-0.343	0.0446894
		MYH9	Gallus gallus myosin, heavy chain 9, non-muscle (MYH9), mRNA. [Source:RefSeq mRNA;Acc:NM_205477]	ENSGALG00000012533	0.78	-0.359	0.029738
		MX	Gallus gallus myxovirus (influenza virus) resistance 1, interferon-inducible protein p78 (mouse) (MX1), mRNA. [Source:RefSeq mRNA;Acc:NM_204609]	ENSGALG00000016142	0.773	-0.372	0.0057437
		ISG12(2)	Gallus gallus ISG12-2 protein-like (ISG12-2), mRNA. [Source:RefSeq mRNA;Acc:NM_001001296]	ENSGALG00000013575	0.759	-0.399	0.00541643
		ERAP1	endoplasmic reticulum aminopeptidase 1 [Source:HGNC Symbol;Acc:18173]	ENSGALG00000014684	0.753	-0.409	0.0407012
		CMPK2	cytidine monophosphate (UMP-CMP) kinase 2, mitochondrial [Source:HGNC Symbol;Acc:27015]	ENSGALG00000028982	0.749	-0.417	0.00882091
		NA	Gallus gallus C-type lectin domain family 2 member D-like (LOC425783), mRNA. [Source:RefSeq mRNA;Acc:NM_001277858]	ENSGALG00000009771	0.743	-0.429	0.00513819
		SLCO2B1	solute carrier organic anion transporter family, member 2B1 [Source:HGNC Symbol;Acc:10962]	ENSGALG00000017302	0.741	-0.433	0.0200449
		IL1RL1	Gallus gallus interleukin 1 receptor-like 1 (IL1RL1), transcript variant 3, mRNA. [Source:RefSeq mRNA;Acc:NM_001024590]	ENSGALG00000016785	0.738	-0.438	0.017005
		PDK4	Gallus gallus pyruvate dehydrogenase kinase, isozyme 4 (PDK4), nuclear gene encoding mitochondrial protein, mRNA. [Source:RefSeq mRNA;Acc:NM_001199909]	ENSGALG00000009700	0.736	-0.442	0.0276221
		ODC1	Gallus gallus ornithine decarboxylase 1 (ODC1), mRNA. [Source:RefSeq mRNA;Acc:NM_001167766]	ENSGALG00000016444	0.733	-0.448	0.000542501
		C7	complement component 7 [Source:HGNC Symbol;Acc:1346]	ENSGALG00000014835	0.728	-0.458	0.00882091
		ZC3HAV1	zinc finger CCCH-type antiviral protein 1 [Source:RefSeq peptide;Acc:NP_001012956]	ENSGALG00000013911	0.726	-0.463	0.0136159
		ABCB1LB	Gallus gallus ATP-binding cassette, sub-family B (MDR/TAP), member 1-like B (ABCB1LB), mRNA. [Source:RefSeq mRNA;Acc:NM_204894]	ENSGALG00000008912	0.716	-0.481	0.00834175
		NA	Uncharacterized protein [Source:UniProtKB/TrEMBL;Acc:E1BQC5]	ENSGALG00000012072	0.707	-0.5	0.00255503
		KCNMB2	potassium large conductance calcium-activated channel, subfamily M, beta member 2 [Source:HGNC Symbol;Acc:6286]	ENSGALG00000027617	0.702	-0.51	0.000188597
		NA	Uncharacterized protein [Source:UniProtKB/TrEMBL;Acc:F1P3J2]	ENSGALG00000006384	0.702	-0.51	0.000319245
		RNF213	ring finger protein 213 [Source:HGNC Symbol;Acc:14539]	ENSGALG00000006988	0.683	-0.55	0.000568991
		ARRDC3	arrestin domain containing 3 [Source:HGNC Symbol;Acc:29263]	ENSGALG00000025915	0.668	-0.582	6.87229e-07
		CTGF	Gallus gallus connective tissue growth factor (CTGF), mRNA. [Source:RefSeq mRNA;Acc:NM_204274]	ENSGALG00000002909	0.665	-0.589	0.000118499
		ZNFX1	zinc finger, NFX1-type containing 1 [Source:HGNC Symbol;Acc:29271]	ENSGALG00000004859	0.593	-0.754	1.50932e-08
		NA	Ubiquitin carboxyl-terminal hydrolase [Source:UniProtKB/TrEMBL;Acc:E1BXQ0]	ENSGALG00000013057	0.593	-0.755	1.50932e-08
Negative Lens	2 days to 3 days	TNC	Gallus gallus tenascin C (TNC), mRNA. [Source:RefSeq mRNA;Acc:NM_205456]	ENSGALG00000007113	1.456	0.542	0.00435786
		ABCB1LB	Gallus gallus ATP-binding cassette, sub-family B (MDR/TAP), member 1-like B (ABCB1LB), mRNA. [Source:RefSeq mRNA;Acc:NM_204894]	ENSGALG00000008912	1.443	0.529	0.00445706
		SPARCL1	SPARC-like 1 (hevin) [Source:HGNC Symbol;Acc:11220]	ENSGALG00000010929	1.417	0.503	0.00599439
		HSPA5	Gallus gallus heat shock 70kDa protein 5 (glucose-regulated protein, 78kDa) (HSPA5), mRNA. [Source:RefSeq mRNA;Acc:NM_205491]	ENSGALG00000001000	1.404	0.489	0.00435786
		ITPR3	inositol 1,4,5-trisphosphate receptor, type 3 [Source:HGNC Symbol;Acc:6182]	ENSGALG00000003149	1.383	0.468	0.0252853
		TES	Gallus gallus testis derived transcript (3 LIM domains) (TES), mRNA. [Source:RefSeq mRNA;Acc:NM_204623]	ENSGALG00000009398	1.383	0.468	0.0252853
		CCBE1	collagen and calcium binding EGF domains 1 [Source:HGNC Symbol;Acc:29426]	ENSGALG00000027785	1.376	0.461	0.0198929
		HSP70	Gallus gallus heat shock 70kDa protein 2 (HSPA2), mRNA. [Source:RefSeq mRNA;Acc:NM_001006685]	ENSGALG00000011715	1.324	0.405	0.0146658
		CGT	Gallus gallus UDP glycosyltransferase 8 (UGT8), mRNA. [Source:RefSeq mRNA;Acc:NM_204204]	ENSGALG00000012018	1.297	0.376	0.0456656
Positive Lens	1 day to 2 days	No genes differentially-expressed
Positive Lens	2 days to 3 days	No genes differentially-expressed

## Sheet: TableS10_GSEA_AL+Refraction
Supplementary Table S10. KEGG pathways correlated with axial length and/or ocular refraction across lens-groups at 1, 2, and 3 days
GSEA was conducted with 1000 phenotype permutations using a continuous increasing phenotype label based on individual axial length (results to left) or refraction (results to right) measures across all samples at each time-point (1, 2, and 3 days). Pearson’s metric, which uses Pearson’s correlation to determine the degree of linear relationship between the gene set and expression profiles, was us…
Time	KEGG pathway name	Size	Axial length analysis					Refraction analysis
			ES	NES	FDR q-val	LES		ES	NES	FDR q-val	LES
1 Day	Arrhythmogenic right ventricular cardiomyopathy ARVC	52	0.47	1.84	0.071	ACTN1, ATP2A2, CDH2, CTNNA1, CTNNA2, DES, GJA1, ITGA1, ITGA4, ITGA6, ITGA8, ITGA9, ITGB1, ITGB3, ITGB8, LAMA2, PKP2, SGCB, TCF7L1		-0.461587	-1.77179	0.0746098	ACTN1, CACNA1S, CACNA2D4, CTNNA1, CTNNA2, DES, GJA1, ITGA1, ITGA11, ITGA6, ITGA8, ITGA9, ITGB3, ITGB8, LAMA2, PKP2, SGCB, TCF7L1
	Adipocytokine signaling pathway	50	0.45	1.74	0.089	ACACB, ACSL1, ACSL5, ACSL6, ADIPOQ, ADIPOR2, CD36, CPT1A, NFKBIA, NPY, PPARGC1A, PRKCQ, TNFRSF1A, TRADD		-0.482722	-1.8749	0.0442792	ACACB, ACSL1, ACSL5, ACSL6, ADIPOQ, ADIPOR2, CD36, CPT1A, NFKBIA, NPY, PPARGC1A, PRKAA2, PRKCQ, TNFRSF1A, TRADD
	Fatty acid metabolism	27	0.6	1.74	0.118	ACAA1, ACAA2, ACADS, ACADSB, ACAT1, ACAT2, ACOX1, ACSL1, ACSL4, ACSL5, ACSL6, ALDH3A2, CPT1A, CPT2, ECI2, HADHA, HADHB		-0.641235	-1.81429	0.0596304	ACAA1, ACAA2, ACADS, ACADSB, ACAT1, ACAT2, ACOX1, ACSL1, ACSL5, ACSL6, ALDH3A2, CPT1A, CPT2, ECI2, HADHA, HADHB
	Apoptosis	56	0.42	1.67	0.152	AIFM1, APAF1, BCL2, CAPN1, CAPN2, CASP10, CASP3, CASP6, CASP8, CFLAR, DFFA, ENDOD1, MYD88, NFKBIA, PIK3R3, PPP3CB, PRKACB, PRKX, RIPK1, TNFRSF1A, TNFSF10, TRADD		-0.388132	-1.53015	0.205865	APAF1, BCL2, CAPN1, CASP6, CASP7, CASP8, ENDOD1, IRAK4, MYD88, NFKBIA, PIK3R3, PPP3CB, RIPK1, TNFRSF1A, TNFSF10, TRADD
	ECM receptor interaction	62	0.52	1.75	0.161	CD36, CD44, COL3A1, COL4A1, COL4A2, COL5A2, COMP, ITGA1, ITGA4, ITGA6, ITGA8, ITGA9, ITGB1, ITGB3, ITGB8, LAMA2, LAMA4, LAMB1, LAMB4, LAMC1, SDC4, THBS1, THBS4		-0.482458	-1.61948	0.16624	CD36, CD44, CHAD, COL3A1, COL4A1, COL4A2, COL5A2, COMP, ITGA1, ITGA11, ITGA6, ITGA8, ITGA9, ITGB3, ITGB8, LAMA2, LAMA4, LAMB1, LAMC1, SDC4, THBS1, THBS4
	Hematopoietic cell lineage	35	0.45	1.59	0.224	CD34, CD36, CD44, CSF1R, CSF3R, DNTT, IL2RA, ITGA1, ITGA4, ITGA6, ITGB3		-0.459943	-1.62674	0.180712	ANPEP, CD34, CD36, CD3D, CD4, CD44, CD5, CSF1R, CSF3R, DNTT, IL2RA, ITGA1, ITGA4, ITGA6, ITGB3, MME
	Biosynthesis of unsaturated fatty acids	17	0.54	1.54	0.23	ACAA1, ACOT7, ACOX1, ELOVL2, ELOVL5, ELOVL6, FADS1, HADHA, TECR, YOD1		-0.598515	-1.67903	0.127326	ACAA1, ACOT7, ACOX1, ELOVL2, ELOVL5, ELOVL6, FADS1, HADHA, TECR
	PPAR signaling pathway	42	0.4	1.55	0.244	ACAA1, ACOX1, ACSL1, ACSL5, ACSL6, ADIPOQ, ANGPTL4, AQP7, CD36, CPT1A, CPT2, LPL, PPARG, SCP2		-0.461102	-1.76992	0.0566233	ACAA1, ACOX1, ACSL1, ACSL5, ACSL6, ADIPOQ, ANGPTL4, AQP7, CD36, CPT1A, CPT2, CYP27A1, LPL, PPARG, SCP2
	Antigen processing and presentation	24	0.47	1.64	0.172	B2M, CD4, CREB1, CTSB, HSPA4, NFYA, PSME3, RFXAP, TAP1, TAP2		-0.32503	-1.12619	0.600867	N/A
	Tight junction	88	0.36	1.52	0.225	ACTN1, CLDN10, CTNNA1, CTNNA2, CTNNA3, EPB41L1, EXOC4, GNAI1, JAM3, LLGL1, MLLT4, MPP5, MRAS, MYH10, MYH11, MYH13, MYH9, MYL12A, MYL9, PARD6A, PARD6G, PPP2R2C, PRKCA, PRKCD, PRKCH, PRKCI, PRKCQ, PTEN, RRAS2, TJAP1, TJP3		-0.341123	-1.46824	0.307634	N/A
	Vascular smooth muscle contraction	71	0.38	1.53	0.225	ACTG2, ADCY5, ADCY6, CACNA1C, CACNA1S, CALD1, EDNRA, GNA11, ITPR2, KCNMB2, KCNMB4, MAP2K2, MRVI1, MYH11, MYL9, MYLK, MYLK2, PLA2G10, PLA2G12A, PLA2G4A, PLCB4, PRKACB, PRKCA, PRKCD, PRKCH, PRKCQ, PRKX		-0.320531	-1.30953	0.483396	N/A
	Viral myocarditis	31	0.42	1.51	0.226	ABL2, CASP3, CASP8, CAV1, LAMA2, MYH10, MYH11, MYH13, MYH9, SGCB		-0.375646	-1.36433	0.403162	N/A
	Glycosylphosphatidylinositol GPI anchor biosynthesis	21	0.51	1.54	0.24	PIGA, PIGF, PIGK, PIGL, PIGM, PIGN, PIGQ, PIGW		-0.466797	-1.39647	0.386752	N/A
	Toll like receptor signaling pathway	55	0.314838	1.20658	0.567699	N/A		-0.392206	-1.55133	0.201795	CASP8, CTSK, IRAK4, IRF5, JUN, LY96, MAP2K2, MAP2K4, MAPK13, MYD88, NFKBIA, PIK3R3, RIPK1, STAT1, TICAM1, TLR3, TRAF6
	Leishmania infection	35	0.441065	1.48486	0.256316	N/A		-0.453786	-1.53873	0.207262	IFNGR2, IRAK4, ITGB1, ITGB2, JUN, MAPK13, MARCKSL1, MYD88, NCF1, NFKBIA, PTGS2, STAT1, TGFB2, TRAF6
	Cytosolic DNA sensing pathway	19	0.43388	1.38741	0.347834	N/A		-0.493874	-1.5573	0.211948	ADAR, IL18, NFKBIA, POLR1D, POLR3B, POLR3F, RIPK1, TMEM173
	Focal adhesion	154	0.350244	1.56245	0.25617	N/A		-0.356451	-1.56938	0.212174	ACTN1, BCL2, CAV1, CAV2, CAV3, CHAD, COL3A1, COL4A1, COL4A2, COL5A2, COMP, CRKL, DIAPH1, DOCK1, EGF, FIGF, FLNB, FLT1, FLT4, FN1, ITGA1, ITGA11, ITGA6, ITGA8, ITGA9, ITGB1, ITGB3, ITGB8, JUN, LAMA2, LAMA4, LAMB1, LAMB2, LAMB4, LAMC1, MYL12A, MYL9, MYLK, MYLK2, PAK4, PARVB, PARVG, PDGFD, PGF, PIK3R3, PIP5K1C, PXN, SOS1, THBS1, THBS4, TLN1, VAV2, VCL, VEGFA, VEGFC, ZYX
	Sphingolipid metabolism	30	0.314078	1.28079	0.500102	N/A		-0.392287	-1.58156	0.212399	ACER2, ACER3, ARSA, CERK, GLA, KDSR, NEU4, PPAP2A, SGMS1, SPTLC2
2 Days	RNA polymerase	19	0.63	1.88	0.041	POLR1A, POLR1B, POLR1C, POLR1E, POLR2B, POLR2E, POLR2H, POLR2I, POLR2K, POLR2L, POLR3B, POLR3H, POLR3K		-0.60358	-1.78267	0.113054	POLR1A, POLR1B, POLR1C, POLR1D, POLR1E, POLR2B, POLR2E, POLR2H, POLR2I, POLR2K, POLR2L, POLR3B, POLR3K
	Oxidative phosphorylation	77	0.59	1.8	0.073	ATP5A1, ATP5C1, ATP5D, ATP5F1, ATP5G3, ATP5H, ATP5J2, ATP6V0C, ATP6V0D2, ATP6V0E1, ATP6V1G1, ATP6V1H, COX5A, COX6A1, COX6C, COX7A2L, NDUFA10, NDUFA2, NDUFA5, NDUFA8, NDUFAB1, NDUFB1, NDUFB10, NDUFB5, NDUFB6, NDUFB8, NDUFC2, NDUFS1, NDUFS2, NDUFS3, NDUFS5, NDUFV1, NDUFV2, SDHA, SDHD, TCIRG1, UQCR10, UQCR11, UQCRC1, UQCRC2, UQCRFS1, UQCRH		-0.568287	-1.75197	0.10144	ATP5A1, ATP5B, ATP5C1, ATP5D, ATP5F1, ATP5G3, ATP5H, ATP5J, ATP5J2, ATP6V0C, ATP6V0D2, ATP6V0E1, ATP6V1G1, ATP6V1H, COX11, COX5A, COX6A1, COX6C, COX7A2L, NDUFA10, NDUFA2, NDUFA5, NDUFA8, NDUFAB1, NDUFB10, NDUFB4, NDUFB5, NDUFB6, NDUFB8, NDUFC2, NDUFS1, NDUFS2, NDUFS3, NDUFS5, NDUFS7, NDUFS8, NDUFV1, NDUFV2, SDHA, SDHD, TCIRG1, UQCR10, UQCR11, UQCRC1, UQCRC2, UQCRFS1, UQCRH
	Parkinsons disease	78	0.57	1.76	0.075	APAF1, ATP5A1, ATP5C1, ATP5D, ATP5F1, ATP5G3, ATP5H, COX5A, COX6A1, COX6C, COX7A2L, HTRA2, LRRK2, NDUFA10, NDUFA2, NDUFA5, NDUFA8, NDUFAB1, NDUFB1, NDUFB10, NDUFB5, NDUFB6, NDUFB8, NDUFC2, NDUFS1, NDUFS2, NDUFS3, NDUFS5, NDUFV1, NDUFV2, PARK2, PINK1, PPID, SDHA, SDHD, SLC25A6, SNCAIP, UBB, UBE2G2, UBE2L3, UQCR10, UQCR11, UQCRC1, UQCRC2, UQCRFS1, UQCRH, VDAC1		-0.526118	-1.67646	0.194736	APAF1, ATP5A1, ATP5B, ATP5C1, ATP5D, ATP5F1, ATP5G3, ATP5H, ATP5J, COX5A, COX6A1, COX6C, COX7A2L, HTRA2, LRRK2, NDUFA10, NDUFA2, NDUFA5, NDUFA8, NDUFAB1, NDUFB10, NDUFB4, NDUFB5, NDUFB6, NDUFB8, NDUFC2, NDUFS1, NDUFS2, NDUFS3, NDUFS5, NDUFS7, NDUFS8, NDUFV1, NDUFV2, PARK2, PINK1, PPID, SDHA, SDHD, SLC25A6, SNCAIP, UBB, UBE2G2, UBE2L3, UQCR10, UQCR11, UQCRC1, UQCRC2, UQCRFS1, UQCRH
	Citrate cycle tca cycle	24	0.61	1.68	0.137	DLD, DLST, IDH2, IDH3A, IDH3B, IDH3G, MDH1, MDH2, OGDHL, PDHA1, PDHB, SDHA, SDHD, SUCLG1		-0.665829	-1.88579	0.0585009	CS, DLD, DLST, IDH2, IDH3A, IDH3B, IDH3G, MDH1, MDH2, OGDHL, PDHA1, PDHB, SDHA, SDHD, SUCLG1
	Huntingtons disease	125	0.44	1.68	0.168	APAF1, ATP5A1, ATP5C1, ATP5D, ATP5F1, ATP5G3, ATP5H, CLTA, COX5A, COX6A1, COX6C, COX7A2L, CREB1, DCTN2, DCTN4, HAP1, NDUFA10, NDUFA2, NDUFA5, NDUFA8, NDUFAB1, NDUFB1, NDUFB10, NDUFB5, NDUFB6, NDUFB8, NDUFC2, NDUFS1, NDUFS2, NDUFS3, NDUFS5, NDUFV1, NDUFV2, PLCB4, POLR2B, POLR2E, POLR2I, POLR2K, POLR2L, PPARG, PPID, SDHA, SDHD, SLC25A6, SOD2, TAF4, TAF4B, TGM2, UQCR10, UQCR11, UQCRC1, UQCRC2, UQCRF…		-0.414542	-1.58872	0.289641	N/A
	Butanoate metabolism	22	0.64	1.61	0.24	AACS, ACAT1, ACAT2, ALDH3A2, BDH2, HADHA, HMGCL, HMGCS1, PDHA1, PDHB		-0.62254	-1.55653	0.287014	N/A
3 Days	Cysteine and methionine metabolism	25	0.56	1.76	0.158	AHCY, AHCYL1, AMD1, APIP, CDO1, ENOPH1, GOT1, GOT2, LDHB, MAT1A, MAT2B, MPST, MTR, TRDMT1		-0.569931	-1.76264	0.17652	AHCY, AHCYL1, AMD1, APIP, CDO1, ENOPH1, GOT1, GOT2, LDHB, MAT1A, MPST, MTR, TRDMT1
	Primary immunodeficiency	21	-0.69	-1.79	0.11	BLNK, CD3D, CD3E, CD4, CD8A, CIITA, ICOS, IL2RG, IL7R, LCK, PTPRC, RFXANK, UNG, ZAP70		0.712347	1.81732	0.0662266	BLNK, BTK, CD3D, CD3E, CD4, CD8A, CIITA, ICOS, IL2RG, IL7R, LCK, PTPRC, RFXANK, UNG, ZAP70

[truncated: 1 more sheets: TableS11_GSEA_Time]
